# Supplementary material
Source: PubMed Central journal article supplement (PMC4052839)
Supplement: NIHMS541942-supplement-Supp_Material.pdf [file NIHMS541942-supplement-Supp_Material.pdf]

## **SUPPLEMENTARY FIGURES**

### **Supplementary Figure 1 – Hierarchical clustering of miRNA profiles in the human cases**

CNT= Control, MSA = Multiple System Atrophy, DLB = Dementia with Lewy Bodies, AD = Alzheimer's Disease, PSP = Progressive supranuclear palsy and CBD = Corticobasal degeneration.

### **Supplementary Figure 2 – Representative immunoblot image of SLC6A6**

Full-length immunoblot with Santa Cruz antibody against SLC6A6 showing the complete banding pattern observed. For the purposes of this paper the 49kDa band was analyzed. Comparable results were observed with the Millipore SIC6A6 antibody.

## **SUPPLEMENTARY TABLES**

### **Supplementary Table 1 – Demographic data of human cases used.**

MSA = Multiple System Atrophy, DLB = Dementia with Lewy Bodies, AD = Alzheimer's Disease, PSP = Progressive supranuclear palsy and CBD = Corticobasal degeneration.  
PMI = Post-mortem interval

### **Supplementary Table 2 – Details of the transgenic mouse models used.**

MSA = Multiple System Atrophy, DLB = Dementia with Lewy Bodies, PD = Parkinson's disease, AD = Alzheimer's Disease.

**Supplementary Table 3 – qPCR primer sequences for miRNA machinery analysis in mice and humans.**

**Supplementary Table 4 – qPCR primer sequences for SLC1A1 and SLC6A6 analysis in mice and humans.**

**Supplementary Table 5 – Detailed results of miRNA profiles in human cases compared to control**

MSA = Multiple System Atrophy, DLB = Dementia with Lewy Bodies, PD = Parkinson's disease, AD = Alzheimer's Disease. Changes that met our selection criteria of  $\pm 2$ -fold regulation and  $p < 0.05$  are in bold and italicized \* indicates  $p < 0.05$ , \*\* indicates  $p < 0.01$ , calculated based on a Student's t-test of the replicate  $2^{(-\Delta Ct)}$  values for each miRNA.

**Supplementary Table 6 – Detailed results of miRNA profiles in transgenic mouse models compared to non tg mice.**

Changes that met our selection criteria of  $\pm 2$ -fold regulation and  $p < 0.05$  are in bold and italicized \* indicates  $p < 0.05$ , \*\* indicates  $p < 0.01$  calculated based on a Student's t-test of the replicate  $2^{(-\Delta Ct)}$  values for each miRNA.

Supplementary Figure 1 – Hierarchical clustering of miRNA profiles in the human

cases

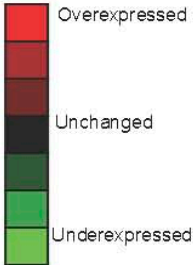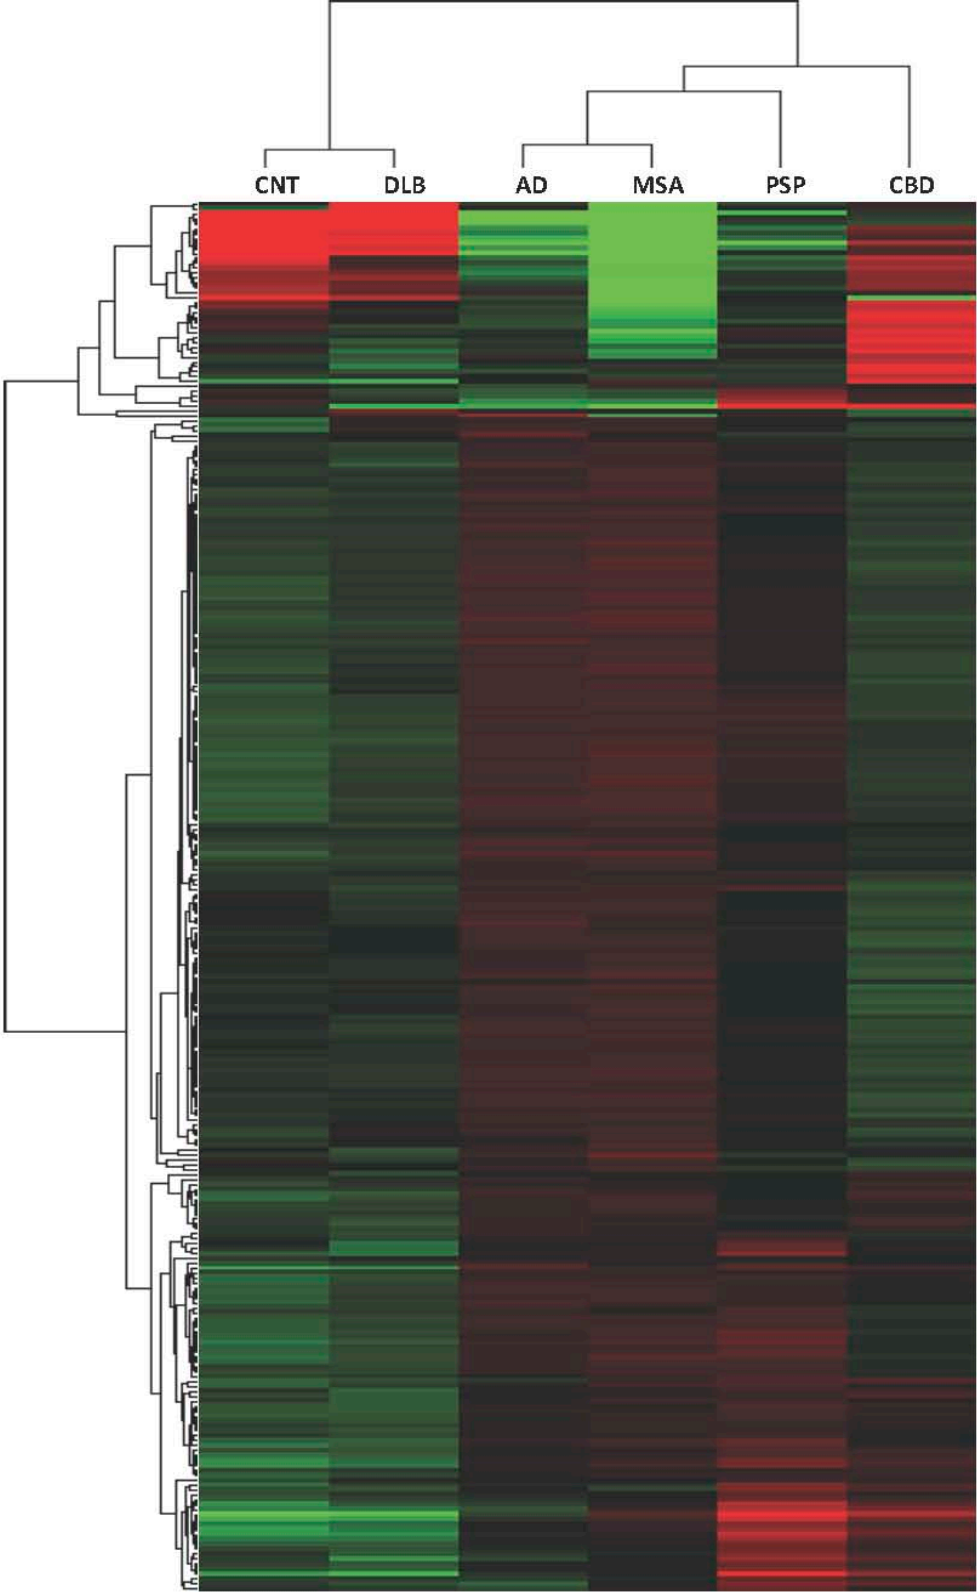

Supplementary Figure 2 – Representative immunoblot image of SLC6A6

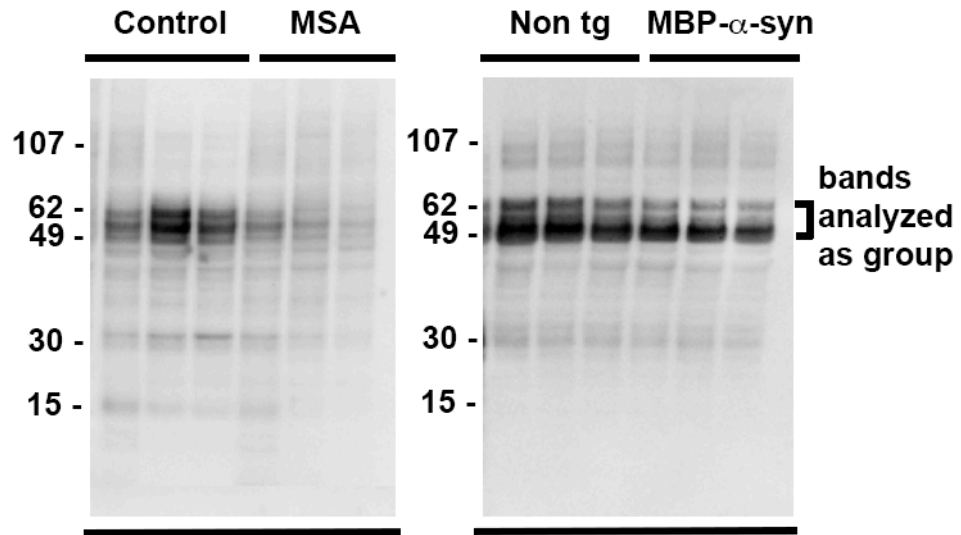

**Supplementary Table 1 – Demographic data of human cases used**

| Diagnosis | N | AGE                 | SEX    | PMI                |
|-----------|---|---------------------|--------|--------------------|
| CONTROL   | 4 | 70.5 yrs $\pm$ 7.9  | 2F, 2M | 7.75 hrs $\pm$ 3.6 |
| MSA       | 3 | 63.25 yrs $\pm$ 4.0 | 1F, 2M | 9.5 hrs $\pm$ 3.9  |
| AD        | 3 | 82.3 yrs $\pm$ 9.2  | 2F, 1M | 6.75 hrs $\pm$ 4.6 |
| DLB       | 3 | 73.5 yrs $\pm$ 6.9  | 3F     | 8.63 hrs $\pm$ 4.5 |
| CBD       | 3 | 69.5 yrs $\pm$ 5.2  | 2F, 1M | 6.72 hrs $\pm$ 4.7 |
| PSP       | 3 | 65.5 yrs $\pm$ 6.7  | 1F, 2M | 7.68 hrs $\pm$ 4.8 |

**Supplementary Table 2 – Details of the transgenic mouse models used.**

| Model          | Disease   | Details                                                                                                                                                                                                                                                                                                                                                                                                                                                                                                                                                                                                                                                                                                | Reference                                                                                                                                                     |
|----------------|-----------|--------------------------------------------------------------------------------------------------------------------------------------------------------------------------------------------------------------------------------------------------------------------------------------------------------------------------------------------------------------------------------------------------------------------------------------------------------------------------------------------------------------------------------------------------------------------------------------------------------------------------------------------------------------------------------------------------------|---------------------------------------------------------------------------------------------------------------------------------------------------------------|
| MBP1-hasyn tg  | MSA       | Transgenic (tg) mice expressing human (h) alpha-synuclein (hasyn) under the control of the oligodendrocyte-specific Myelin Basic Protein(MBP) promoter express high levels of hasyn and display severe neurological alterations and die prematurely at 6 months of age. Furthermore, mice developed progressive accumulation of hasyn-immunoreactive inclusions in oligodendrocytes along the axonal tracts in the brainstem, basal ganglia, cerebellum, corpus callosum, and neocortex. The inclusions reacted with antibodies against phospho-serine (129) hasyn and ubiquitin, and hasyn was found in the detergent-insoluble fraction.                                                             | J Neurosci. 2005 Nov 16;25(46):10689-99. Shults CW, Rockenstein E, Crews L, Adame A, Mante M, Larrea G, Hashimoto M, Song D, Iwatsubo T, Tsuboi K, Masliah E. |
| MBP29-hasyn tg | MSA       | Tg mice expressing hasyn under the control of the oligodendrocyte-specific MBP promoter - HIGH EXPRESSER. In addition to the features observed in the the MBP1 line, in the high-expresser MBP29 line the white matter tracts displayed intense astrogliosis, myelin pallor, and decreased neurofilament immunostaining.                                                                                                                                                                                                                                                                                                                                                                               | J Neurosci. 2005 Nov 16;25(46):10689-99. Shults CW, Rockenstein E, Crews L, Adame A, Mante M, Larrea G, Hashimoto M, Song D, Iwatsubo T, Tsuboi K, Masliah E. |
| mThy1-hasyn tg | DLB/PD    | Tg mice expressing hasyn under the control of the mThy1.2 promoter. In these mice, hasyn accumulated in synapses and neurons throughout the brain, including the thalamus, basal ganglia, substantia nigra, and brainstem                                                                                                                                                                                                                                                                                                                                                                                                                                                                              | J Neurosci Res. 2002 Jun 1;68(5):568-78. Rockenstein E, Mallory M, Hashimoto M, Song D, Shults CW, Lang I, Masliah E.                                         |
| mThy1-hAPP tg  | AD        | Tg mice expressing human APP751 cDNA containing the London (V717I) and Swedish (K670M/N671L) mutations under the regulatory control of the murine (m)Thy-1 gene. High levels of hAPP expression are found in neurons in layers 4-5 of the neocortex, hippocampal CA1 and olfactory bulb. As early as 3-4 months of age, line 41 mice developed mature plaques in the frontal cortex, whereas at 5-7 months plaque formation extended to the hippocampus, thalamus and olfactory region. Ultrastructural and double-immunolabeling analysis confirmed that most plaques were mature and contained dystrophic neurites immunoreactive with antibodies against APP, synaptophysin, neurofilament and tau. | J Neurosci Res. 2001 Nov 15;66(4):573-82. Rockenstein E, Mallory M, Mante M, Sisk A, Masliah E.                                                               |
| mThy1-htau     | Tauopathy | These tg mice over-express TAU441 bearing the missense mutations V337M and R406W under the control of the brain specific murine Thy-1 promoter. This human mutated TAU isoform is expressed in high levels and the TAU pathology is visible in early age, starting at 4 months. Severity of the brain pathology correlates with increasing age and behavioral deficits whereas no motor deficits occur.                                                                                                                                                                                                                                                                                                | Kindly donated by JSW Life Sciences GmbH, 8020 Graz, Austria.                                                                                                 |

**Supplementary Table 3 -qPCR primer sequences for miRNA machinery analysis in mice and humans.**

| <b>MOUSE</b>      |                                   |
|-------------------|-----------------------------------|
| <b>Probe</b>      | <b>Sequence 5'- 3'</b>            |
| mDROSHA Forward   | GCA GCA ATG GAT GCA CTG GA        |
| mDROSHA Reverse   | TGA TGC TCT CTT TCC CAC CTC A     |
| mDCGR8 Forward    | ACG AAT ACA TGC AGC GTG TCC       |
| mDCGR8 Reverse    | GGA GGC ACC AAA AGG CTC AC        |
| mExportin Forward | AGA AGA GCT CCC GGT TAG TGA TG    |
| mExportin Reverse | CA GGA CGA GGG GAT CCT TG         |
| mDicer1 Forward   | GAG ACC AGG GTC CAC AAA ACG       |
| mDicer1 Reverse   | TAA CAA GGC TGG TCG GGT TTG       |
| mAgo2 Forward     | CAT GAC AGC GCT GAA GGA AG        |
| mAgo2 Reverse     | CAG TGT GTC CTG GTG GAC CT        |
| mGAPDH Forward    | GGT GAA GGT CGG TGT GAA CG        |
| mGAPDH Reverse    | AGG TCA ATG AAG GGG TCG TTG       |
| <b>HUMAN</b>      |                                   |
| <b>Probe</b>      | <b>Sequence 5'- 3'</b>            |
| hDROSHA Forward   | TGT TTA CTT GGA GGG AAG CCT GGA   |
| hDROSHA Reverse   | TGG GTG GAG AGG ATA ATT GAG CCA   |
| hDCGR8 Forward    | GGG CGC CTC AGG TAG AAG AAG AA    |
| hDCGR8 Reverse    | ACT CAG CTT AAG TGA CTG GCG A     |
| hExportin Forward | CCC TGC ACA GAG CAG ATT CTG AAA   |
| hExportin Reverse | TCA AGC ATA TCC AGA GCC TTG GTG   |
| hDicer1 Forward   | TGA TGC CAG TTG GGA AAG AGA CTG   |
| hDicer1 Reverse   | TTT GGG TAG CAC TGC CTT CGT TTC   |
| hAgo2 Forward     | ATC GAG ATC AAG GTG TGG GCC AT    |
| hAgo2 Reverse     | CTT TCT GAG CTG CTC TGT GAA GGA C |
| hGAPDH Forward    | AAG ATC ATC AGC AAT GCC TCC TGC   |
| hGAPDH Reverse    | ATG GAC TGT GGT CAT GAG TCC TTC   |

**Supplementary Table 4 – qPCR primer sequences for SLC1A1 and SLC6A6 analysis in mice and humans**

| <b>MOUSE</b>    |                                 |
|-----------------|---------------------------------|
| <b>Probe</b>    | <b>Sequence 5'- 3'</b>          |
| mSLC1A1 Forward | TGG TGA CCA TGG TGA TCG TG      |
| mSLC1A1 Reverse | GGT CCA GGA GCC AGT CAA CA      |
| mSLC6A6 Forward | AAG GGG CCA CAC CCT TTC AC      |
| mSLC6A6 Reverse | TCA TGG TCT CCA CAA TGA CGT G   |
| mGAPDH Forward  | GGT GAA GGT CGG TGT GAA CG      |
| mGAPDH Reverse  | AGG TCA ATG AAG GGG TCG TTG     |
| <b>HUMAN</b>    |                                 |
| <b>Probe</b>    | <b>Sequence 5'- 3'</b>          |
| hSLC1A1 Forward | ATC ACC ATC AGT ATC ACG GCC ACA |
| hSLC1A1 Reverse | TCG ACA GCA ATG ATC AGG GTG ACA |
| hSLC6A6 Forward | AGA ATG GTG GAG GTG CGT TTC TC  |
| hSLC6A6 Reverse | AGG GAC ACA ATT ACA ACG GAG GC  |
| hGAPDH Forward  | AAG ATC ATC AGC AAT GCC TCC TGC |
| hGAPDH Reverse  | ATG GAC TGT GGT CAT GAG TCC TTC |



Supplementary Table 5 – Detailed results of miRNA profiles in human cases compared to control

| Mature ID       | Fold Regulation (compared to Control) |         |                 |                 |         |
|-----------------|---------------------------------------|---------|-----------------|-----------------|---------|
|                 | MSA                                   | DLB     | AD              | PSP             | CBD     |
| hsa-let-7a      | -0.2247                               | 1.0027  | -0.4181         | -0.4163         | -0.7304 |
| hsa-let-7b      | -0.5048                               | -0.8244 | -0.9111         | -0.9113         | 1.5763  |
| hsa-let-7c      | -0.2813                               | 1.0561  | -0.4961         | -0.5336         | -0.7554 |
| hsa-let-7d      | -0.2621                               | -0.9342 | -0.3535         | -0.4117         | -0.5923 |
| hsa-let-7d*     | 1.6141                                | 1.0909  | 1.4015          | 1.2139          | 1.0566  |
| hsa-let-7e      | -0.4227                               | 1.1425  | -0.7248         | -0.7886         | 1.1014  |
| hsa-let-7f      | -0.1122                               | -0.8902 | -0.1586         | -0.1774         | -0.2434 |
| hsa-let-7g      | -0.2172                               | -0.8275 | -0.2755         | -0.3164         | -0.412  |
| hsa-let-7i      | -0.3197                               | -0.6936 | -0.4234         | -0.4258         | -0.6027 |
| hsa-miR-1       | -0.5155                               | -0.7204 | -0.4352         | -0.3624         | -0.3563 |
| hsa-miR-100     | -0.6244                               | -0.836  | -0.7428         | -0.7527         | -0.8301 |
| hsa-miR-101     | 1.4978                                | 1.0822  | 1.2357          | -0.9847         | -0.7047 |
| hsa-miR-101*    | <b>2.6738**</b>                       | 1.3302  | <b>2.2406**</b> | 1.7438          | 1.2143  |
| hsa-miR-103     | -0.7738                               | -0.8537 | 1.0384          | 1.0025          | 1.8234  |
| hsa-miR-103-2*  | <b>2.5779**</b>                       | 1.1972  | <b>2.2061**</b> | 1.6777          | 1.2339  |
| hsa-miR-106a    | -0.8053                               | -0.8493 | -0.8265         | -0.7448         | -0.8863 |
| hsa-miR-106a*   | <b>2.6844**</b>                       | 1.2266  | <b>2.2746*</b>  | 1.9078          | 1.335   |
| hsa-miR-106b    | 1.1244                                | -0.8839 | 1.0902          | -0.8837         | 1.0477  |
| hsa-miR-107     | -0.8968                               | -0.977  | 1.0879          | 1.1013          | 2.152   |
| hsa-miR-1180    | 1.8271                                | 1.222   | 1.6005          | 1.2865          | -0.9134 |
| hsa-miR-1181    | <b>2.4268**</b>                       | 1.1829  | <b>2.049*</b>   | 1.5076          | 1.0705  |
| hsa-miR-1182    | 1.7525                                | 1.064   | 1.4042          | 1.8388          | 1.3611  |
| hsa-miR-1183    | 1.0242                                | -0.9593 | 1.1457          | -0.9187         | 1.0646  |
| hsa-miR-1185    | <b>2.0742**</b>                       | 1.2069  | 1.874           | 1.3547          | 1.0798  |
| hsa-miR-1193    | 1.9163                                | -0.9519 | 1.5951          | 1.3959          | 1.4023  |
| hsa-miR-1201    | <b>2.5505**</b>                       | 1.2355  | <b>2.1912**</b> | 1.6825          | 1.2741  |
| hsa-miR-1202    | <b>2.468**</b>                        | 1.1758  | <b>2.1249**</b> | 1.8206          | 1.2557  |
| hsa-miR-1203    | <b>2.1228*</b>                        | 1.0359  | 1.8852          | 1.7445          | 1.2117  |
| hsa-miR-1207-5p | -0.3587                               | 1.2186  | -0.32           | -0.5551         | -0.4556 |
| hsa-miR-122*    | <b>2.765**</b>                        | 1.2616  | <b>2.364**</b>  | 1.8004          | 1.263   |
| hsa-miR-1224-3p | <b>2.2977**</b>                       | 1.2246  | <b>2.2564**</b> | <b>2.0222 *</b> | 1.4694  |
| hsa-miR-1224-5p | 1.9138                                | 1.0605  | 1.6324          | 1.7196          | 1.676   |
| hsa-miR-1225-3p | 1.8331                                | 1.0449  | 1.5233          | 1.2133          | -0.9049 |
| hsa-miR-1225-5p | <b>3.0985**</b>                       | 1.2113  | <b>3.1233**</b> | <b>2.834**</b>  | 2.2802  |
| hsa-miR-1226*   | <b>2.5964**</b>                       | 1.2092  | <b>2.2202 *</b> | 1.8944          | 1.2566  |
| hsa-miR-1228    | <b>2.455**</b>                        | 1.1442  | <b>2.0881 *</b> | 1.5833          | 1.1537  |
| hsa-miR-1228*   | <b>4.9367*</b>                        | 1.2295  | <b>2.7329**</b> | <b>6.486**</b>  | 4.3623  |
| hsa-miR-1229    | 1.4844                                | 1.011   | 1.2757          | 1.0059          | -0.9341 |
| hsa-miR-1231    | <b>2.7436*</b>                        | 1.1988  | <b>2.2554**</b> | 1.9148          | 1.3314  |
| hsa-miR-1233    | <b>2.4242*</b>                        | 1.1267  | 1.8923          | 1.6374          | 1.176   |
| hsa-miR-1234    | 1.7561                                | 1.0208  | 1.5879          | 1.1377          | -0.8845 |
| hsa-miR-1236    | <b>2.7096**</b>                       | 1.2668  | <b>2.2671**</b> | 1.8106          | 1.2679  |
| hsa-miR-1237    | <b>2.5322**</b>                       | 1.1837  | <b>2.1995**</b> | 1.6361          | 1.2199  |
| hsa-miR-1238    | <b>2.5365**</b>                       | 1.2371  | <b>2.0775**</b> | 1.7046          | 1.1977  |
| hsa-miR-124     | 1.0125                                | -0.8501 | -0.9445         | 1.3114          | 1.6764  |
| hsa-miR-124*    | 1.9937                                | 1.2023  | 1.7417          | 1.3976          | 1.1971  |
| hsa-miR-1243    | 1.9275                                | -0.9615 | 1.6903          | 1.3127          | -0.9726 |
| hsa-miR-1244    | <b>2.0133**</b>                       | 1.0192  | 1.7642          | 1.3483          | -0.987  |
| hsa-miR-1246    | -0.1186                               | 1.0941  | -0.1291         | -0.3152         | -0.2642 |
| hsa-miR-1247    | <b>2.6433**</b>                       | 1.1948  | <b>2.1981**</b> | 1.6598          | 1.1361  |
| hsa-miR-1248    | -0.4155                               | -0.7452 | -0.432          | -0.4665         | -0.5505 |

| Mature ID       | Fold Regulation (compared to Control) |         |                 |                 |         |
|-----------------|---------------------------------------|---------|-----------------|-----------------|---------|
|                 | MSA                                   | DLB     | AD              | PSP             | CBD     |
| hsa-miR-1249    | 1.8424                                | 1.242   | 1.7804          | 1.5089          | 1.1539  |
| hsa-miR-1250    | <b>2.3547**</b>                       | 1.0709  | 1.8887          | 1.5852          | 1.1881  |
| hsa-miR-1253    | <b>2.2805**</b>                       | 1.273   | 1.8418          | 1.5108          | 1.18    |
| hsa-miR-1255b   | <b>2.5295**</b>                       | 1.2228  | <b>2.1145**</b> | 1.7207          | 1.1802  |
| hsa-miR-1258    | -0.4867                               | -0.4912 | -0.4322         | -0.3071         | -0.2302 |
| hsa-miR-1259    | 1.9571                                | 1.1162  | 1.6509          | 1.3005          | -0.9199 |
| hsa-miR-125a-3p | <b>2.1788*</b>                        | 1.3442  | 1.8606          | 1.8986          | 1.5894  |
| hsa-miR-125a-5p | -0.8684                               | 1.0546  | -0.9441         | 1.2404          | 1.2587  |
| hsa-miR-125b    | 1.0249                                | -0.9365 | 1.2802          | 1.2378          | 1.2806  |
| hsa-miR-125b-1* | -0.4731                               | -0.6203 | -0.4398         | -0.4896         | -0.6081 |
| hsa-miR-125b-2* | 1.8007                                | 1.2357  | 1.8408          | 1.4441          | 1.2681  |
| hsa-miR-126     | -0.5339                               | 1.2864  | -0.5924         | -0.5921         | -0.6724 |
| hsa-miR-126*    | 1.0395                                | 1.1014  | 1.0254          | 1.0964          | -0.9305 |
| hsa-miR-1260    | -0.3131                               | -0.6558 | -0.2997         | -0.3005         | -0.2641 |
| hsa-miR-1260b   | -0.1147                               | -0.6816 | -0.1401         | -0.1411         | -0.1464 |
| hsa-miR-1262    | <b>2.2844*</b>                        | 1.1471  | <b>2.0477**</b> | 1.5833          | 1.2003  |
| hsa-miR-1268    | -0.6874                               | -0.8801 | -0.7354         | -0.8457         | -0.8797 |
| hsa-miR-127-3p  | -0.7182                               | 1.0179  | -0.8687         | -0.6889         | -0.6635 |
| hsa-miR-127-5p  | 1.9171                                | 1.2579  | 1.8883          | 1.4672          | 1.3484  |
| hsa-miR-1270    | <b>2.6719**</b>                       | 1.2163  | <b>2.2158**</b> | 1.8614          | 1.3157  |
| hsa-miR-1271    | <b>2.1472**</b>                       | 1.0297  | 1.8906          | 1.5213          | 1.1288  |
| hsa-miR-1272    | 1.4587                                | 1.1055  | 1.2511          | 1.0436          | -0.7689 |
| hsa-miR-1273    | 1.2736                                | 1.0541  | 1.1779          | -0.9408         | -0.6799 |
| hsa-miR-1273c   | <b>2.7954**</b>                       | 1.2573  | <b>2.3159**</b> | 1.8841          | 1.3198  |
| hsa-miR-1273d   | <b>2.1953*</b>                        | 1.1167  | 1.8333          | 1.4715          | 1.0315  |
| hsa-miR-1274a   | -0.314                                | -0.5476 | -0.4148         | -0.3537         | -0.2729 |
| hsa-miR-1274b   | -0.2398                               | -0.5111 | -0.2953         | -0.3432         | -0.2168 |
| hsa-miR-1275    | 2.3832                                | 1.2411  | 1.745           | <b>2.3342**</b> | 1.7352  |
| hsa-miR-128     | -0.4252                               | -0.9827 | -0.4058         | -0.5344         | -0.7045 |
| hsa-miR-1280    | -0.1029                               | -0.6683 | -0.1426         | -0.1161         | -0.1245 |
| hsa-miR-1281    | 1.8991                                | 1.2572  | 2.2402          | 1.2937          | 1.1036  |
| hsa-miR-1282    | 1.9225                                | 1.0994  | 1.5743          | 1.256           | -0.901  |
| hsa-miR-1285    | -0.7359                               | -0.9529 | -0.6575         | -0.6114         | -0.5283 |
| hsa-miR-1287    | <b>2.4923**</b>                       | 1.1825  | <b>2.0761*</b>  | 1.6525          | 1.1746  |
| hsa-miR-129*    | -0.8563                               | -0.8064 | -0.7908         | -0.6831         | 1.1464  |
| hsa-miR-129-3p  | -0.8523                               | -0.7948 | 1.2022          | -0.7285         | 1.0774  |
| hsa-miR-129-5p  | -0.6689                               | -0.766  | -0.6693         | -0.6314         | -0.9399 |
| hsa-miR-1290    | -0.1382                               | -0.9549 | -0.1308         | -0.2861         | -0.245  |
| hsa-miR-1291    | 1.5539                                | 1.0848  | 1.5001          | 1.3226          | 1.1575  |
| hsa-miR-1292    | <b>2.7846**</b>                       | 1.3274  | <b>2.2341**</b> | 1.9699          | 1.2973  |
| hsa-miR-1296    | 1.3213                                | 1.1349  | 1.6285          | 1.5241          | 1.6039  |
| hsa-miR-1298    | <b>2.5203**</b>                       | 1.1928  | <b>2.1866**</b> | <b>2.0506**</b> | 1.3417  |
| hsa-miR-1299    | <b>2.2959**</b>                       | 1.1789  | 1.9443          | 1.5377          | 1.2006  |
| hsa-miR-1301    | 1.8408                                | 1.0136  | 1.6971          | 1.4337          | 2.4098  |
| hsa-miR-1303    | 1.7712                                | 1.1059  | 1.6187          | 1.3342          | 1.0617  |
| hsa-miR-1306    | <b>2.2514**</b>                       | 1.1047  | 1.8918          | 1.5363          | 1.0818  |
| hsa-miR-1307    | -0.833                                | 1.0335  | 1.1828          | 1.2469          | 1.3058  |
| hsa-miR-1308    | -0.1065                               | -0.731  | -0.1851         | -0.3415         | -0.4113 |
| hsa-miR-130a    | -0.8446                               | 1.2625  | 1.1772          | -0.9721         | 1.1624  |
| hsa-miR-130b    | 1.8344                                | 1.1041  | 1.6027          | 1.4432          | 1.3818  |
| hsa-miR-132     | -0.5608                               | 1.0272  | -0.6574         | -0.7944         | 1.1573  |
| hsa-miR-132*    | <b>2.1275*</b>                        | 1.076   | 1.7253          | 1.3697          | -0.9848 |
| hsa-miR-1321    | 1.1561                                | -0.8926 | -0.9535         | 1.2393          | 1.0002  |
| hsa-miR-1322    | <b>2.2037**</b>                       | 1.2095  | 1.9648          | 1.4537          | 1.0105  |

| Mature ID       | Fold Regulation (compared to Control) |         |                 |                 |         |
|-----------------|---------------------------------------|---------|-----------------|-----------------|---------|
|                 | MSA                                   | DLB     | AD              | PSP             | CBD     |
| hsa-miR-133a    | 1.8356                                | 1.3032  | 1.6521          | 1.4009          | 1.8544  |
| hsa-miR-133b    | <b>2.3601**</b>                       | 1.243   | <b>2.0096**</b> | 1.6311          | 1.7199  |
| hsa-miR-134     | 1.0567                                | 1.0371  | -0.9406         | -0.7213         | -0.4518 |
| hsa-miR-135a    | 1.1631                                | -0.9187 | -0.997          | -0.7772         | -0.5292 |
| hsa-miR-136     | 1.5126                                | 1.1162  | 1.2913          | -0.9727         | -0.7524 |
| hsa-miR-136*    | <b>2.1688*</b>                        | 1.2443  | 1.8944          | 1.4203          | 1.0289  |
| hsa-miR-137     | -0.6162                               | 1.1356  | -0.5345         | -0.4356         | -0.2994 |
| hsa-miR-138     | -0.6074                               | -0.7623 | -0.8447         | -0.8576         | 1.419   |
| hsa-miR-138-1*  | <b>2.4561*</b>                        | 1.173   | <b>2.0118**</b> | 1.5807          | 1.1625  |
| hsa-miR-138-2*  | <b>2.4327*</b>                        | 1.0788  | 1.9717          | 1.5317          | 1.3302  |
| hsa-miR-139-3p  | 1.3318                                | 1.2162  | 1.5235          | 1.2527          | 1.4335  |
| hsa-miR-139-5p  | -0.8018                               | 1.005   | -0.9615         | -0.8313         | 1.0128  |
| hsa-miR-140-3p  | 1.0943                                | 1.1978  | 1.3663          | 1.3822          | 1.1403  |
| hsa-miR-140-5p  | -0.9678                               | 1.1489  | -0.9189         | -0.7774         | -0.7255 |
| hsa-miR-141     | 1.8494                                | -0.9652 | 1.5889          | 1.2811          | -0.9447 |
| hsa-miR-141*    | <b>2.5322**</b>                       | 1.1737  | <b>2.2752**</b> | 1.7782          | 1.1864  |
| hsa-miR-142-3p  | 1.9155                                | 1.0218  | 1.635           | 1.2456          | -0.8518 |
| hsa-miR-143     | -0.6667                               | 3.4831  | 1.3107          | 1.1251          | 1.3131  |
| hsa-miR-143*    | <b>2.7699**</b>                       | 1.6525  | <b>2.2985**</b> | 1.8111          | 1.5906  |
| hsa-miR-145     | -0.9592                               | 3.9684  | 1.8115          | 1.6584          | 1.7125  |
| hsa-miR-145*    | <b>2.5263**</b>                       | 1.5945  | <b>2.2752**</b> | 1.7037          | 1.2774  |
| hsa-miR-146a    | 1.3138                                | 1.1392  | 1.4785 *        | 1.1294          | 1.379   |
| hsa-miR-146a*   | <b>3.0933**</b>                       | 1.2854  | <b>2.3276**</b> | <b>2.3233**</b> | 1.4627  |
| hsa-miR-146b-5p | 1.3921                                | 1.0987  | 1.1553          | 1.0422          | 1.0029  |
| hsa-miR-148a    | <b>2.5205**</b>                       | 1.3777  | <b>2.0751*</b>  | 1.6329          | 1.1343  |
| hsa-miR-148b    | 1.6523                                | -0.9748 | 1.3581          | 1.0748          | -0.7505 |
| hsa-miR-149     | -0.9721                               | 1.1419  | 1.1585          | 1.0349          | 1.0479  |
| hsa-miR-149*    | 1.5326                                | 1.0321  | 1.1441          | 1.9857          | 1.2918  |
| hsa-miR-150     | 1.7852                                | 1.118   | 1.6094          | 1.2918          | 1.4056  |
| hsa-miR-150*    | 1.8102                                | -0.8415 | 1.5795          | 1.7917          | 1.2064  |
| hsa-miR-151-3p  | 1.1298                                | -0.879  | -0.9957         | -0.9179         | 1.1187  |
| hsa-miR-151-5p  | -0.6364                               | -0.6541 | -0.7443         | -0.7384         | 1.2367  |
| hsa-miR-152     | 1.6116                                | 1.2281  | 1.4012          | 1.1559          | -0.8314 |
| hsa-miR-153     | 1.3824                                | 1.1494  | 1.2193          | 1.0219          | -0.7335 |
| hsa-miR-1538    | <b>2.1752*</b>                        | 1.3227  | 1.9197          | <b>2.6923**</b> | 1.982   |
| hsa-miR-154     | -0.6337                               | 1.0218  | -0.717          | -0.6934         | -0.6833 |
| hsa-miR-154*    | <b>2.1308*</b>                        | 1.1966  | 1.8601          | 1.3893          | -0.9863 |
| hsa-miR-155     | <b>2.2895**</b>                       | 1.1545  | <b>2.0317*</b>  | 1.6423          | 1.1641  |
| hsa-miR-15a     | -0.4026                               | -0.7559 | -0.426          | -0.3968         | -0.4438 |
| hsa-miR-15b     | 1.0998                                | -0.8375 | -0.9759         | -0.9976         | -0.8049 |
| hsa-miR-16      | -0.4033                               | -0.7499 | -0.4465         | -0.5001         | -0.681  |
| hsa-miR-17      | -0.6154                               | -0.8245 | -0.7376         | -0.7304         | -0.8797 |
| hsa-miR-17*     | 1.1594                                | -0.9769 | 1.0789          | -0.8909         | -0.8032 |
| hsa-miR-181a    | -0.3395                               | -0.6387 | -0.5061         | -0.4643         | 1.7634  |
| hsa-miR-181a*   | <b>2.7633**</b>                       | 1.1843  | <b>2.2892**</b> | 1.7715          | 1.2537  |
| hsa-miR-181b    | -0.3848                               | -0.6948 | -0.6365         | -0.5823         | -0.9715 |
| hsa-miR-181c    | -0.8114                               | -0.9322 | -0.7779         | -0.7174         | -0.6471 |
| hsa-miR-181c*   | 1.9916                                | 1.0768  | 1.7639          | 1.4374          | 1.4119  |
| hsa-miR-181d    | -0.6167                               | -0.7725 | -0.5996         | -0.5403         | -0.6282 |
| hsa-miR-1825    | <b>2.4775**</b>                       | 1.1625  | <b>2.1198*</b>  | 1.5906          | 1.1943  |
| hsa-miR-1826    | -0.5228                               | -0.9755 | -0.5945         | -0.515          | -0.819  |
| hsa-miR-1827    | <b>2.6328**</b>                       | 1.2518  | <b>2.2889**</b> | <b>2.123**</b>  | 1.7218  |
| hsa-miR-185     | -0.9045                               | -0.7666 | -0.9684         | 1.0278          | 1.6966  |
| hsa-miR-185*    | <b>2.5852**</b>                       | 1.2166  | <b>2.2509**</b> | <b>2.1071**</b> | 1.4355  |

| Mature ID          | Fold Regulation (compared to Control) |         |                 |                 |         |
|--------------------|---------------------------------------|---------|-----------------|-----------------|---------|
|                    | MSA                                   | DLB     | AD              | PSP             | CBD     |
| hsa-miR-186        | 1.5037                                | 1.0469  | 1.2275          | -0.9748         | -0.698  |
| hsa-miR-187        | <b>2.5844**</b>                       | 1.2407  | <b>2.0671**</b> | 1.6328          | 1.2743  |
| hsa-miR-188-5p     | <b>2.2944**</b>                       | 1.1861  | <b>2.1554*</b>  | 1.9468          | 1.3199  |
| hsa-miR-18a        | 1.9321                                | -0.8959 | 1.5042          | 1.2582          | -0.916  |
| hsa-miR-18a*       | <b>2.5551**</b>                       | 1.2168  | <b>2.1509**</b> | 1.6446          | 1.1913  |
| hsa-miR-18b        | 1.6381                                | 1.0486  | 1.4654          | 1.1692          | -0.9508 |
| hsa-miR-190        | 1.7808                                | 1.1054  | 1.5464          | 1.2474          | -0.817  |
| hsa-miR-1908       | 3.5761                                | 1.2004  | <b>2.2891**</b> | <b>4.2842**</b> | 2.7578  |
| hsa-miR-1909       | 2.9306                                | 1.2018  | <b>2.2251**</b> | <b>3.8335**</b> | 2.5486  |
| hsa-miR-191        | 1.6776                                | -0.8309 | 1.4094          | 1.2365          | 2.7657  |
| hsa-miR-1913       | <b>2.2357*</b>                        | 1.0443  | 1.9954          | 1.5025          | 1.0258  |
| hsa-miR-1914       | <b>2.4521**</b>                       | 1.2075  | <b>2.0998*</b>  | 1.6338          | 1.2168  |
| hsa-miR-1914*      | 1.5834                                | -0.9311 | 1.3807          | 1.4606          | 1.2095  |
| hsa-miR-1915       | <b>2.1626**</b>                       | 1.2299  | 1.7464          | <b>2.1516**</b> | 1.5159  |
| hsa-miR-192        | <b>2.4314**</b>                       | 1.1844  | 1.9074          | 1.6013          | 1.1557  |
| hsa-miR-193a-3p    | <b>2.6193**</b>                       | 1.3914  | <b>2.2449**</b> | 1.8428          | 1.2897  |
| hsa-miR-193a-5p    | <b>2.0292**</b>                       | 1.1968  | 1.9513          | 1.5789          | 1.4397  |
| hsa-miR-193b       | 1.4486                                | -0.8752 | 1.3439          | 1.1576          | 1.5911  |
| hsa-miR-193b*      | <b>2.3344**</b>                       | 1.0307  | 1.8411          | 1.8049          | 1.4284  |
| hsa-miR-194        | <b>2.1052**</b>                       | 1.0522  | 1.8666          | 1.4428          | 1.0187  |
| hsa-miR-194*       | <b>2.4956**</b>                       | 1.1819  | <b>2.2312*</b>  | 1.8625          | 1.2304  |
| hsa-miR-195        | -0.895                                | 1.1219  | -0.9449         | -0.8855         | 1.0711  |
| hsa-miR-196a*      | <b>2.2265**</b>                       | 1.0735  | 1.8912          | 1.5492          | 1.1523  |
| hsa-miR-197        | 1.3452                                | -0.915  | 1.6077          | -0.9217         | -0.8632 |
| hsa-miR-1972       | 1.6269                                | -0.9791 | 1.3828          | 1.2803          | -0.7893 |
| hsa-miR-1973       | -0.5997                               | 1.4476  | -0.5544         | -0.2951         | -0.2982 |
| hsa-miR-1975       | -0.3748                               | -0.9096 | 1.0362          | -0.7677         | -0.8043 |
| hsa-miR-1976       | <b>2.282**</b>                        | 1.1012  | 1.9644          | 1.4736          | 1.0442  |
| hsa-miR-1979       | -0.176                                | -0.699  | -0.3234         | -0.2975         | -0.4788 |
| hsa-miR-198        | 2.7026                                | 1.2199  | 1.7419          | <b>2.2269**</b> | 1.9566  |
| hsa-miR-199a-3p,hs | <b>2.0185*</b>                        | 1.7299  | 1.8218          | 1.4413          | 1.0075  |
| hsa-miR-199a-5p    | <b>2.7737**</b>                       | 1.7575  | <b>2.3744**</b> | 1.9203          | 1.3589  |
| hsa-miR-19a        | <b>2.1893*</b>                        | 1.1012  | 1.8323          | 1.4594          | 1.0173  |
| hsa-miR-19b        | -0.6746                               | -0.8266 | -0.8066         | -0.6782         | -0.7467 |
| hsa-miR-19b-1*     | <b>2.3973**</b>                       | 1.1656  | <b>2.0004*</b>  | 1.5165          | 1.0029  |
| hsa-miR-200b       | 1.5516                                | 1.256   | 1.6902**        | 1.5265          | 1.7744  |
| hsa-miR-202        | <b>2.6803**</b>                       | 1.1906  | <b>2.1573**</b> | 1.8367          | 1.2357  |
| hsa-miR-203        | <b>2.0802**</b>                       | 1.0357  | 1.7785          | 1.4138          | 1.0542  |
| hsa-miR-204        | 1.6539                                | 1.135   | 1.4211          | 1.1439          | -0.8943 |
| hsa-miR-205*       | <b>2.4551*</b>                        | 1.1254  | <b>2.0768**</b> | 1.5733          | 1.1007  |
| hsa-miR-206        | -0.605                                | -0.5837 | -0.6363         | -0.4268         | -0.3498 |
| hsa-miR-20a        | -0.5422                               | -0.7255 | -0.6057         | -0.5528         | -0.6374 |
| hsa-miR-20b        | -0.7538                               | -0.8631 | -0.7299         | -0.6652         | -0.6789 |
| hsa-miR-20b*       | -0.9473                               | 1.0311  | 1.0855          | 1.036           | -0.9876 |
| hsa-miR-21         | -0.5932                               | 1.2073  | -0.5332         | -0.4906         | -0.3487 |
| hsa-miR-210        | 1.2531                                | 1.0859  | 1.0766          | -0.8273         | -0.5447 |
| hsa-miR-2110       | 1.8182                                | 1.1397  | 1.7591          | 1.7922          | 1.4039  |
| hsa-miR-212        | <b>2.4315*</b>                        | 1.1567  | <b>2.0235*</b>  | 1.6023          | 1.5232  |
| hsa-miR-214        | 1.5524                                | 1.3214  | 1.3863          | 1.3646          | 1.0431  |
| hsa-miR-218        | -0.9237                               | 1.0247  | -0.8924         | -0.6815         | -0.555  |
| hsa-miR-218-1*     | 1.4695                                | 1.0609  | 1.2483          | -0.9255         | -0.6436 |
| hsa-miR-219-1-3p   | <b>2.7028**</b>                       | 1.2192  | <b>2.2715**</b> | 1.7341          | 1.2257  |
| hsa-miR-219-2-3p   | -0.4742                               | -0.4791 | -0.4872         | -0.4467         | -0.7484 |
| hsa-miR-219-5p     | -0.4657                               | -0.6025 | -0.4005         | -0.2979         | -0.2305 |

| Mature ID       | Fold Regulation (compared to Control) |         |                 |                 |         |
|-----------------|---------------------------------------|---------|-----------------|-----------------|---------|
|                 | MSA                                   | DLB     | AD              | PSP             | CBD     |
| hsa-miR-22      | -0.656                                | 1.1391  | -0.9467         | -0.8911         | -0.982  |
| hsa-miR-22*     | 1.4463                                | 1.0352  | 1.2923          | 1.0551          | -0.7836 |
| hsa-miR-221     | -0.744                                | -0.9282 | -0.8474         | -0.7884         | 1.306   |
| hsa-miR-221*    | <b>2.2695*</b>                        | 1.0699  | 1.887           | 1.5718          | 1.2102  |
| hsa-miR-222     | -0.7021                               | -0.9457 | 1.0669          | -0.9489         | 1.0298  |
| hsa-miR-223     | 1.0628                                | -0.8691 | 1.096           | -0.9171         | -0.6865 |
| hsa-miR-224     | <b>2.3129*</b>                        | 1.1127  | 1.9935          | 1.5459          | 1.0829  |
| hsa-miR-2278    | <b>2.4061**</b>                       | 1.1459  | <b>2.0182**</b> | 1.5712          | 1.1146  |
| hsa-miR-23a     | -0.4965                               | 1.2633  | -0.5582         | -0.6067         | -0.6182 |
| hsa-miR-23a*    | 2.0585                                | 1.0728  | 1.2531          | 1.6118          | 1.1988  |
| hsa-miR-23b     | -0.5463                               | -0.8659 | -0.6665         | -0.6433         | 1.1956  |
| hsa-miR-24      | 1.1369                                | 1.1575  | 1.5204          | 1.6436          | 2.5154  |
| hsa-miR-25      | 1.9837                                | -0.9948 | 1.5951          | 1.3315          | -0.91   |
| hsa-miR-25*     | <b>2.7173**</b>                       | 1.2378  | <b>2.1305**</b> | <b>2.2238**</b> | 1.4632  |
| hsa-miR-26a     | -0.4631                               | -0.979  | -0.8165         | -0.8181         | 1.1577  |
| hsa-miR-26b     | -0.2878                               | -0.8003 | -0.2919         | -0.2922         | -0.2587 |
| hsa-miR-27a     | -0.6802                               | 1.2798  | -0.5852         | -0.5856         | -0.6046 |
| hsa-miR-27b     | -0.2764                               | -0.831  | -0.2692         | -0.2893         | -0.3288 |
| hsa-miR-28-3p   | <b>2.1042**</b>                       | 1.1169  | 1.7655          | 1.4497          | 1.2015  |
| hsa-miR-28-5p   | -0.9786                               | -0.8605 | 1.0069          | -0.8552         | -0.7652 |
| hsa-miR-296-3p  | <b>2.1953*</b>                        | 1.0788  | 1.8071          | 1.7911          | 1.3633  |
| hsa-miR-296-5p  | <b>2.2016**</b>                       | 1.2439  | 1.7935          | 1.5924          | 1.3813  |
| hsa-miR-297     | <b>2.2214**</b>                       | 1.2121  | 1.9312          | 1.4861          | 1.0583  |
| hsa-miR-298     | 1.9149                                | 1.127   | 1.6256          | 1.9315          | 1.5242  |
| hsa-miR-299-3p  | <b>2.1598*</b>                        | 1.1538  | 1.9763          | 1.5885          | 1.5049  |
| hsa-miR-299-5p  | <b>2.5651**</b>                       | 1.1631  | <b>2.3465**</b> | 1.7845          | 1.8821  |
| hsa-miR-29a     | -0.6445                               | -0.8631 | -0.6034         | -0.6964         | -0.9893 |
| hsa-miR-29b     | -0.1608                               | -0.8126 | -0.1908         | -0.2317         | -0.2555 |
| hsa-miR-29b-1*  | <b>2.0786**</b>                       | 1.0117  | 1.8003          | 1.3457          | -0.9822 |
| hsa-miR-29b-2*  | 1.2967                                | 1.0092  | 1.3469          | 1.1991          | 1.2431  |
| hsa-miR-29c     | -0.3543                               | -0.8749 | -0.3489         | -0.3782         | -0.3768 |
| hsa-miR-29c*    | -0.9501                               | 1.0094  | 1.0406          | -0.9185         | -0.9081 |
| hsa-miR-301a    | <b>2.2994*</b>                        | 1.2021  | 1.9107          | 1.4942          | 1.0634  |
| hsa-miR-302c    | <b>2.4507**</b>                       | 1.2328  | <b>2.1005**</b> | 1.6585          | 1.1736  |
| hsa-miR-30a     | -0.7248                               | 1.1723  | -0.8105         | -0.8942         | -0.95   |
| hsa-miR-30a*    | 1.5756                                | 1.1321  | 1.3999          | 1.1913          | -0.9215 |
| hsa-miR-30b     | -0.8112                               | 1.0173  | 1.0835          | -0.965          | -0.9631 |
| hsa-miR-30b*    | 1.8635                                | 1.1609  | 1.7895          | 1.6378          | 1.2455  |
| hsa-miR-30c     | -0.8997                               | -0.9882 | -0.8791         | -0.8699         | 1.4437  |
| hsa-miR-30c-1*  | 2.2795                                | 1.1539  | 1.9022          | 1.6325          | 1.1888  |
| hsa-miR-30c-2*  | 2.7503                                | 1.2658  | 1.9105          | <b>2.151**</b>  | 1.6588  |
| hsa-miR-30d     | -0.9289                               | -0.9858 | 1.0387          | -0.9539         | 1.9741  |
| hsa-miR-30e     | -0.795                                | -0.9945 | -0.7364         | -0.7251         | -0.8294 |
| hsa-miR-30e*    | 1.8018                                | 1.1614  | 1.5051          | 1.2265          | -0.8881 |
| hsa-miR-31      | 1.7495                                | 1.0172  | 1.3668          | 1.3685          | 2.6379  |
| hsa-miR-3121    | <b>2.1799**</b>                       | 1.1713  | 1.9639          | 1.8979          | 1.2435  |
| hsa-miR-3122    | <b>2.3202**</b>                       | 1.0901  | <b>2.0243*</b>  | <b>2.0196**</b> | 1.6511  |
| hsa-miR-3125    | 1.8232                                | -0.9831 | 1.4919          | 1.7211          | 1.3119  |
| hsa-miR-3126-5p | <b>2.8411*</b>                        | 1.2347  | <b>2.2831*</b>  | <b>2.1432**</b> | 1.4737  |
| hsa-miR-3127    | 1.3201                                | -0.8089 | 1.0318          | -0.9242         | -0.7444 |
| hsa-miR-3131    | 1.8492                                | -0.9856 | 1.527           | 2.1397          | 1.5103  |
| hsa-miR-3132    | 1.2848                                | -0.9542 | 1.0698          | 1.2752          | -0.9596 |
| hsa-miR-3135    | <b>2.7231**</b>                       | 1.1951  | <b>2.2031**</b> | 1.6955          | 1.1634  |
| hsa-miR-3137    | <b>2.5001**</b>                       | 1.1911  | <b>2.1353**</b> | 1.7926          | 1.1936  |

| Mature ID          | Fold Regulation (compared to Control) |         |                 |                 |         |
|--------------------|---------------------------------------|---------|-----------------|-----------------|---------|
|                    | MSA                                   | DLB     | AD              | PSP             | CBD     |
| hsa-miR-3138       | 1.321                                 | -0.9325 | 1.1894          | 1.4498          | -0.9533 |
| hsa-miR-3141       | 1.2433                                | -0.7946 | 1.0031          | 1.6028          | 1.1199  |
| hsa-miR-3144-5p    | 1.9361                                | 1.0996  | 1.6517          | 1.7067          | 1.3721  |
| hsa-miR-3145       | <b>2.2044**</b>                       | 1.1415  | 1.8621          | 1.4036          | 1.0106  |
| hsa-miR-3146       | -0.6397                               | -0.6989 | -0.619          | -0.4441         | -0.3316 |
| hsa-miR-3147       | 1.4527                                | -0.8657 | 1.1273          | 1.4849          | 1.1136  |
| hsa-miR-3149       | 1.0473                                | 1.0466  | -0.9059         | -0.6374         | -0.8399 |
| hsa-miR-3150       | <b>2.6099**</b>                       | 1.2555  | <b>2.2524**</b> | 1.8193          | 1.2992  |
| hsa-miR-3151       | 1.9544                                | 1.0473  | 1.6878          | <b>2.1591**</b> | 1.5856  |
| hsa-miR-3152       | <b>2.1752**</b>                       | 1.1509  | 1.8084          | 1.5757          | 1.0886  |
| hsa-miR-3153       | <b>2.3896*</b>                        | 1.09279 | <b>2.086**</b>  | <b>2.0395**</b> | 1.5792  |
| hsa-miR-3154       | 1.4085                                | -0.9281 | 1.1163          | 1.8818          | 1.3539  |
| hsa-miR-3156       | <b>2.0518*</b>                        | -0.9755 | 1.7636          | 1.7846          | 1.5028  |
| hsa-miR-3162       | 1.1353                                | 1.0566  | -0.8753         | 1.2585          | 1.0899  |
| hsa-miR-3163       | <b>2.3105**</b>                       | 1.1536  | 1.9732          | 1.7562          | 1.4427  |
| hsa-miR-3172       | -0.0389                               | -0.8609 | -0.0811         | -0.0801         | -0.3111 |
| hsa-miR-3173       | 1.8105                                | 1.1189  | 1.5202          | 1.8143          | 1.3232  |
| hsa-miR-3174       | 2.1963                                | 1.0425  | 1.7781          | 1.7906          | 1.7297  |
| hsa-miR-3175       | 1.0137                                | 1.194   | -0.9596         | 1.1087          | -0.7397 |
| hsa-miR-3176       | 1.6985                                | -0.9185 | 1.4096          | 1.1816          | 1.2636  |
| hsa-miR-3177       | <b>2.5601**</b>                       | 1.1543  | <b>2.0436*</b>  | <b>2.0137**</b> | 1.6838  |
| hsa-miR-3178       | 1.0796                                | 1.2205  | -0.7972         | 1.3021          | -0.9057 |
| hsa-miR-3179       | <b>2.2702*</b>                        | 1.1286  | 1.9053          | 1.7673          | 1.4616  |
| hsa-miR-3180-3p    | <b>2.815**</b>                        | 1.2341  | <b>2.1976*</b>  | <b>2.8678*</b>  | 2.017   |
| hsa-miR-3182       | <b>2.3629**</b>                       | 1.0668  | 1.9155          | 1.5575          | 1.0831  |
| hsa-miR-3184       | <b>2.7655**</b>                       | 1.2608  | <b>2.3269*</b>  | 1.9974          | 1.4933  |
| hsa-miR-3185       | <b>2.6651**</b>                       | 1.2111  | <b>2.1215**</b> | <b>2.2944**</b> | 1.8736  |
| hsa-miR-3186-3p    | <b>2.8303**</b>                       | 1.2353  | <b>2.4401*</b>  | 1.9056          | 1.3611  |
| hsa-miR-3187       | <b>2.1089*</b>                        | -0.909  | 1.6763          | 1.3305          | 1.1705  |
| hsa-miR-3189       | <b>2.6061**</b>                       | 1.2143  | <b>2.3181**</b> | 1.9998          | 1.3352  |
| hsa-miR-3190-3p    | <b>2.7253**</b>                       | 1.1485  | <b>2.1918**</b> | <b>2.3464*</b>  | 1.5397  |
| hsa-miR-3190-5p    | <b>2.6417**</b>                       | 1.1874  | <b>2.1964**</b> | <b>2.3035*</b>  | 1.3615  |
| hsa-miR-3191       | <b>2.6721**</b>                       | 1.228   | <b>2.2144*</b>  | 1.9542          | 1.3561  |
| hsa-miR-3192       | <b>2.5767**</b>                       | 1.2356  | <b>2.2464**</b> | <b>2.0296**</b> | 1.4037  |
| hsa-miR-3194       | <b>2.1057**</b>                       | 1.1253  | 1.8457          | 1.6178          | 1.1263  |
| hsa-miR-3195       | <b>2.6782*</b>                        | 1.2519  | <b>2.1707**</b> | 1.9192          | 1.3046  |
| hsa-miR-3196       | -0.9682                               | 1.1929  | 1.0149          | 1.5964          | 1.1679  |
| hsa-miR-3197       | <b>2.5577**</b>                       | 1.1863  | <b>2.1211**</b> | 1.8824          | 1.2351  |
| hsa-miR-3198       | -0.5397                               | -0.5256 | -0.4231         | -0.3947         | -0.3302 |
| hsa-miR-32*        | 1.1467                                | 1.0782  | 1.0769          | -0.7584         | -0.7182 |
| hsa-miR-3200       | 1.7445                                | 1.1864  | 1.8653          | 1.3527          | 1.3686  |
| hsa-miR-3201       | <b>2.2756**</b>                       | 1.0702  | <b>2.0188*</b>  | 1.5341          | 1.0695  |
| hsa-miR-3202       | 1.2902                                | -0.9818 | -0.9398         | 1.2476          | 1.035   |
| hsa-miR-320a,hsa-r | -0.7301                               | -0.8888 | 1.2272          | 1.3721          | 2.1343  |
| hsa-miR-320b       | 1.2578                                | 1.0357  | 1.5224          | 1.5971          | 3.5361  |
| hsa-miR-320c       | -0.8505                               | 1.0649  | 1.1252          | 1.3737          | 1.7994  |
| hsa-miR-320d       | -0.407                                | -0.9886 | -0.584          | -0.5925         | -0.6103 |
| hsa-miR-320e       | -0.8558                               | 1.0021  | -0.6977         | -0.6897         | -0.5987 |
| hsa-miR-323-3p     | 1.7322                                | 1.1959  | 1.4789          | 1.1775          | -0.8833 |
| hsa-miR-323-5p     | <b>2.2555*</b>                        | 1.1167  | 1.9154          | <b>2.0097*</b>  | 1.6674  |
| hsa-miR-323b-5p    | -0.4963                               | -0.8748 | -0.5222         | -0.5252         | -0.5123 |
| hsa-miR-324-3p     | 1.4213                                | 1.2567  | 1.8901          | 1.6235          | 1.6599  |
| hsa-miR-324-5p     | 1.2864                                | -0.9448 | 1.3443          | 1.1405          | 2.2009  |
| hsa-miR-326        | 1.8563                                | 1.1577  | 1.7437          | 1.4141          | 1.1919  |

| Mature ID      | Fold Regulation (compared to Control) |         |                 |                 |         |
|----------------|---------------------------------------|---------|-----------------|-----------------|---------|
|                | MSA                                   | DLB     | AD              | PSP             | CBD     |
| hsa-miR-328    | 1.0925                                | -0.8211 | 1.136           | 1.0018          | 1.2516  |
| hsa-miR-329    | 1.6593                                | 1.1693  | 1.6005          | 1.3431          | 1.1459  |
| hsa-miR-330-3p | 1.3602                                | 1.0174  | 1.4087          | 1.3947          | 1.5856  |
| hsa-miR-330-5p | 1.6211                                | 1.0989  | 1.5585          | 1.3948          | 1.5029  |
| hsa-miR-331-3p | 1.1506                                | 1.1197  | 1.6748          | 1.3581          | 1.4627  |
| hsa-miR-331-5p | <b>2.4395**</b>                       | 1.1859  | <b>2.2826**</b> | 1.6878          | 1.3072  |
| hsa-miR-335    | 1.4445                                | 1.1337  | 1.1901          | -0.9773         | -0.6724 |
| hsa-miR-337-5p | <b>2.5561**</b>                       | 1.1507  | <b>2.1629**</b> | 1.7413          | 1.2016  |
| hsa-miR-338-3p | -0.4262                               | -0.6631 | -0.3735         | -0.3248         | -0.2353 |
| hsa-miR-338-5p | 1.3616                                | -0.8998 | 1.1612          | -0.9945         | 1.1238  |
| hsa-miR-339-3p | 1.8884                                | 1.0517  | 1.5594          | 1.2159          | 1.3577  |
| hsa-miR-339-5p | 1.7809                                | 1.0741  | 1.6751          | 1.5145          | 1.1318  |
| hsa-miR-33a    | <b>2.2632*</b>                        | 1.2221  | 1.8458          | 1.4712          | 1.0452  |
| hsa-miR-340    | 1.3232                                | -0.9894 | 1.2207          | -0.9118         | -0.6421 |
| hsa-miR-342-3p | 1.33784                               | -0.9851 | 1.3414          | 1.2046          | 1.171   |
| hsa-miR-342-5p | 1.8135                                | 1.1156  | 1.5755          | 1.3112          | 1.2898  |
| hsa-miR-345    | 1.6206                                | 1.0457  | 1.7776          | 1.3848          | 1.2742  |
| hsa-miR-346    | <b>2.4024**</b>                       | 1.1341  | 1.9919          | 1.6143          | 1.5334  |
| hsa-miR-34a    | -0.7171                               | -0.882  | -0.8464         | -0.8239         | 1.4231  |
| hsa-miR-34b*   | 1.9713                                | 1.0178  | 1.6087          | 1.3376          | 1.0828  |
| hsa-miR-34c-5p | <b>2.2516**</b>                       | 1.1729  | <b>2.0078**</b> | 1.4404          | 1.1691  |
| hsa-miR-361-3p | 1.2954                                | 1.0231  | 1.2162          | 1.0224          | -0.9559 |
| hsa-miR-361-5p | -0.9915                               | -0.863  | 1.0307          | -0.9089         | 1.1419  |
| hsa-miR-362-5p | <b>2.8167**</b>                       | 1.2392  | <b>2.2871**</b> | 1.7938          | 1.8531  |
| hsa-miR-363    | <b>2.189**</b>                        | 1.0998  | 1.8807          | 1.4346          | 1.049   |
| hsa-miR-363*   | -0.8188                               | -0.7703 | -0.7091         | -0.6095         | -0.6395 |
| hsa-miR-365    | 1.7182                                | 1.0026  | 1.4078          | 1.1425          | -0.8198 |
| hsa-miR-365*   | <b>2.4041**</b>                       | 1.114   | 1.9502          | 1.9448          | 1.5681  |
| hsa-miR-367    | <b>2.5911**</b>                       | 1.2324  | <b>2.2028**</b> | 1.8084          | 1.2031  |
| hsa-miR-369-3p | <b>2.3393*</b>                        | 1.1641  | 1.8132          | 1.4867          | -0.9854 |
| hsa-miR-370    | 1.3006                                | 1.0984  | 1.7701          | 1.3969          | 1.8232  |
| hsa-miR-371-5p | <b>2.9686**</b>                       | 1.2689  | <b>2.3261**</b> | <b>2.4776**</b> | 1.7575  |
| hsa-miR-373*   | <b>3.0354*</b>                        | 1.2372  | <b>2.4664**</b> | <b>2.4994**</b> | 1.5365  |
| hsa-miR-374a   | 1.7555                                | 1.2225  | 1.4992          | 1.1431          | -0.8893 |
| hsa-miR-374b   | 1.1812                                | 1.0591  | 1.0377          | -0.8123         | -0.5748 |
| hsa-miR-376a   | 1.9176                                | 1.0225  | 1.5733          | 1.2891          | -0.9003 |
| hsa-miR-376b   | <b>2.4939**</b>                       | 1.1887  | <b>2.1314**</b> | 1.6034          | 1.1555  |
| hsa-miR-376c   | -0.8921                               | -0.9633 | -0.7341         | -0.6509         | -0.5066 |
| hsa-miR-377*   | <b>2.2671*</b>                        | 1.1067  | 1.8286          | 1.4901          | 1.1208  |
| hsa-miR-378    | -0.9189                               | -0.9992 | -0.8066         | -0.8151         | -0.9067 |
| hsa-miR-378c   | 1.5321                                | 1.1546  | 1.4462          | 1.5508          | 1.2259  |
| hsa-miR-379    | 1.4136                                | 1.2181  | 1.7726          | 1.3371          | 1.4661  |
| hsa-miR-381    | 1.6484                                | 1.1561  | 1.5106          | 1.2549          | 1.2423  |
| hsa-miR-382    | 1.1371                                | 1.0089  | 1.2258          | 1.0588          | 1.1947  |
| hsa-miR-383    | 1.8151                                | 1.1234  | 1.9558          | 1.5116          | 1.4171  |
| hsa-miR-409-3p | 1.8971                                | 1.1797  | 1.7509          | 1.2927          | 1.6067  |
| hsa-miR-409-5p | <b>2.0623*</b>                        | 1.074   | 1.9046          | 1.3561          | 1.0229  |
| hsa-miR-410    | 1.5957                                | 1.1679  | 1.3771          | 1.0833          | -0.7712 |
| hsa-miR-411    | 1.9513                                | -0.96   | 1.6745          | 1.2981          | -0.9844 |
| hsa-miR-412    | <b>2.7915**</b>                       | 1.2758  | <b>2.3148**</b> | 1.7964          | 1.3071  |
| hsa-miR-421    | 1.9935                                | 1.1519  | 1.8097          | 1.4312          | 1.0611  |
| hsa-miR-422a   | <b>2.2012**</b>                       | 1.1155  | 1.8576          | 1.5136          | 1.1017  |
| hsa-miR-423-3p | 1.1959                                | 1.0443  | 1.5213          | 1.4169          | 1.9391  |
| hsa-miR-423-5p | 1.0334                                | -0.7639 | 1.1962          | 1.2747          | 2.2982  |

| Mature ID      | Fold Regulation (compared to Control) |         |                 |                 |         |
|----------------|---------------------------------------|---------|-----------------|-----------------|---------|
|                | MSA                                   | DLB     | AD              | PSP             | CBD     |
| hsa-miR-424    | <b>2.4531*</b>                        | 1.1595  | <b>2.0493*</b>  | 1.5664          | 1.0491  |
| hsa-miR-425    | 1.5472                                | 1.0572  | 1.4971          | 1.1672          | 1.0581  |
| hsa-miR-425*   | 1.4868                                | -0.9275 | 1.3662          | 1.1354          | 1.0281  |
| hsa-miR-4251   | <b>2.5196**</b>                       | 1.1638  | <b>2.2215*</b>  | 1.8342          | 1.3032  |
| hsa-miR-4253   | <b>2.6445**</b>                       | 1.1476  | <b>2.3303*</b>  | 1.8901          | 1.3618  |
| hsa-miR-4257   | <b>2.1649*</b>                        | -0.9589 | 1.7151          | 1.9818          | 1.366   |
| hsa-miR-4258   | <b>2.3298**</b>                       | -0.9962 | <b>2.0848**</b> | 1.698           | 1.1367  |
| hsa-miR-4259   | 1.0243                                | -0.8108 | -0.8646         | -0.8272         | -0.6872 |
| hsa-miR-4261   | 1.6212                                | 1.0264  | 1.4171          | 1.3282          | 1.0255  |
| hsa-miR-4265   | -0.8942                               | -0.9459 | -0.9467         | -0.8883         | 1.0593  |
| hsa-miR-4270   | 2.074                                 | -0.8448 | 1.4652          | <b>2.4616**</b> | 1.7494  |
| hsa-miR-4271   | -0.8466                               | 1.0656  | -0.6775         | -0.9427         | -0.7999 |
| hsa-miR-4274   | <b>2.1531*</b>                        | 1.1908  | 1.8631          | 1.7176          | 1.1451  |
| hsa-miR-4281   | <b>2.4267*</b>                        | 1.0467  | <b>2.0741**</b> | <b>2.5439**</b> | 1.5277  |
| hsa-miR-4284   | -0.3905                               | -0.9174 | -0.7848         | -0.6616         | 1.0576  |
| hsa-miR-4286   | -0.1014                               | -0.5775 | -0.1675         | -0.1624         | -0.1022 |
| hsa-miR-4292   | <b>2.5851**</b>                       | 1.2411  | <b>2.2381**</b> | 1.9314          | 1.4993  |
| hsa-miR-4294   | 2.8429                                | 1.1824  | 1.7631          | <b>3.2707**</b> | 2.3749  |
| hsa-miR-4298   | -0.8204                               | -0.8629 | 1.0962          | -0.9622         | -0.7566 |
| hsa-miR-4299   | 2.3488                                | 1.2555  | 1.8008          | 1.5214          | 1.2371  |
| hsa-miR-4300   | <b>2.5652**</b>                       | 1.2363  | <b>2.2459*</b>  | <b>2.2011**</b> | 1.4753  |
| hsa-miR-4301   | <b>2.5971**</b>                       | 1.1596  | <b>2.2139**</b> | 1.7335          | 1.3645  |
| hsa-miR-4306   | 1.2026                                | -0.9528 | 1.0458          | 1.0875          | -0.8766 |
| hsa-miR-431*   | <b>2.1285**</b>                       | 1.1308  | 1.8907          | 1.4824          | 1.2251  |
| hsa-miR-4312   | <b>2.8541**</b>                       | 1.2754  | <b>2.4801**</b> | 1.8041          | 1.3735  |
| hsa-miR-4314   | -0.9519                               | -0.9151 | -0.834          | 1.0485          | -0.7966 |
| hsa-miR-432    | 1.7022                                | 1.1904  | 1.7561          | 1.4072          | 2.4148  |
| hsa-miR-4323   | <b>2.0801*</b>                        | 1.0584  | 1.8422          | 1.3837          | -0.9742 |
| hsa-miR-4324   | -0.2612                               | -0.892  | -0.3431         | -0.3431         | -0.3797 |
| hsa-miR-4327   | 1.9306                                | 1.1506  | 1.5492          | <b>2.0774**</b> | 1.6399  |
| hsa-miR-433    | 1.2057                                | 1.0669  | 1.5342          | 1.0961          | 1.2656  |
| hsa-miR-451    | -0.4919                               | -0.782  | -0.4208         | -0.4401         | -0.3433 |
| hsa-miR-454    | <b>2.0762**</b>                       | 1.092   | 1.6051          | 1.2801          | -0.9427 |
| hsa-miR-455-3p | <b>2.1284**</b>                       | 1.0438  | 1.9437          | 1.4612          | 1.5827  |
| hsa-miR-455-5p | <b>2.0839**</b>                       | 1.134   | 1.8332          | 1.4774          | 1.0626  |
| hsa-miR-483-3p | <b>2.7953*</b>                        | 1.1227  | <b>2.0661*</b>  | 1.3899          | 1.3373  |
| hsa-miR-483-5p | -0.6483                               | -0.7641 | -0.4979         | -0.5946         | -0.6055 |
| hsa-miR-484    | 1.8325                                | 1.0266  | 1.7551          | 1.5071          | 1.5294  |
| hsa-miR-485-3p | 1.6019                                | 1.1115  | 1.5511          | 1.3487          | 1.2168  |
| hsa-miR-485-5p | 1.8891                                | 1.0695  | 1.9454          | 1.6337          | 1.6101  |
| hsa-miR-486-3p | <b>2.5441**</b>                       | 1.1791  | <b>2.1434**</b> | 1.9222          | 1.3005  |
| hsa-miR-486-5p | 1.8757                                | -0.9965 | 1.5727          | 1.5266          | 1.3382  |
| hsa-miR-487a   | -0.9931                               | 1.0995  | -0.9099         | -0.7799         | -0.6844 |
| hsa-miR-487b   | 1.246                                 | 1.0543  | 1.3477          | 1.1104          | 1.0741  |
| hsa-miR-488    | 1.4741                                | 1.1249  | 1.2675          | -0.9225         | -0.6593 |
| hsa-miR-488*   | <b>2.4018**</b>                       | 1.1328  | <b>2.0517**</b> | 1.5442          | 1.1638  |
| hsa-miR-490-3p | <b>2.7262**</b>                       | 1.2497  | <b>2.3497**</b> | 1.8566          | 1.5238  |
| hsa-miR-490-5p | <b>2.2541**</b>                       | 1.0214  | 1.9895          | 1.5537          | 1.5597  |
| hsa-miR-491-3p | <b>2.3668**</b>                       | 1.0923  | 1.9207          | 1.8111          | 1.5103  |
| hsa-miR-491-5p | 1.4969                                | 1.1994  | 1.8427          | 1.6946          | 1.9417  |
| hsa-miR-493    | -0.5443                               | 1.0339  | -0.6054         | -0.7195         | -0.6289 |
| hsa-miR-494    | 1.2365                                | 1.2102  | -0.9584         | -0.7731         | -0.7536 |
| hsa-miR-495    | 1.1944                                | 1.1362  | 1.2084          | 1.0067          | -0.7991 |
| hsa-miR-497    | -0.7431                               | -0.9823 | -0.8667         | -0.7488         | -0.7949 |



| Mature ID                       | Fold Regulation (compared to Control) |         |                 |                 |         |
|---------------------------------|---------------------------------------|---------|-----------------|-----------------|---------|
|                                 | MSA                                   | DLB     | AD              | PSP             | CBD     |
| hsa-miR-498                     | <b>2.7226**</b>                       | 1.2231  | <b>2.3511**</b> | 1.8389          | 1.3031  |
| hsa-miR-499-5p                  | <b>2.2947**</b>                       | 1.0828  | 1.8881          | 1.4604          | -0.9876 |
| hsa-miR-500*                    | 1.6933                                | 1.1603  | 1.4802          | 1.2562          | 1.072   |
| hsa-miR-500,hsa-miR-500-3p      | <b>2.3868**</b>                       | 1.1933  | <b>2.1154**</b> | 1.6626          | 1.3301  |
| hsa-miR-501-3p                  | <b>2.2457**</b>                       | 1.2148  | 1.9095          | 1.7859          | 1.5719  |
| hsa-miR-502-3p                  | <b>2.1304**</b>                       | 1.0709  | 1.9118          | 1.5446          | 1.4702  |
| hsa-miR-503                     | <b>2.5109**</b>                       | 1.1749  | <b>2.287**</b>  | 1.7266          | 1.2283  |
| hsa-miR-504                     | 1.7751                                | 1.1419  | 1.9691          | 1.6823          | 1.4239  |
| hsa-miR-505                     | <b>2.6701*</b>                        | 1.2312  | <b>2.2272**</b> | 1.7064          | 1.2637  |
| hsa-miR-505*                    | <b>2.6918**</b>                       | 1.2209  | <b>2.2599**</b> | <b>2.2941**</b> | 1.4781  |
| hsa-miR-509-3p                  | 1.6361                                | 1.1546  | 1.4357          | 1.2368          | 1.0294  |
| hsa-miR-513a-3p                 | 1.6972                                | 1.1215  | 1.5346          | 1.2712          | -0.9009 |
| hsa-miR-513a-5p                 | 1.4507                                | 1.1743  | 1.1107          | 1.0348          | -0.8329 |
| hsa-miR-513b                    | <b>2.5421*</b>                        | 1.2841  | 1.8852          | 1.5777          | 1.2085  |
| hsa-miR-513c                    | <b>2.553**</b>                        | 1.192   | <b>2.1976**</b> | 1.7217          | 1.2421  |
| hsa-miR-514b-5p                 | <b>2.0495 *</b>                       | 1.0517  | 1.8271          | <b>2.3484 *</b> | 1.7328  |
| hsa-miR-518c*                   | <b>2.0151*</b>                        | 1.0031  | 1.6931          | 1.6819          | 1.1666  |
| hsa-miR-518d-5p,hsa-miR-518d-3p | <b>2.7435 *</b>                       | 1.2364  | <b>2.3252**</b> | 1.9371          | 1.3169  |
| hsa-miR-519a                    | <b>2.7815**</b>                       | 1.2838  | <b>2.2677**</b> | 1.7684          | 1.2308  |
| hsa-miR-519c-3p                 | <b>2.8293**</b>                       | 1.3035  | <b>2.3359**</b> | 1.9352          | 1.3648  |
| hsa-miR-520f                    | 1.4808                                | 1.1002  | 1.6165          | 1.2837          | 1.1056  |
| hsa-miR-525-3p                  | <b>2.5824**</b>                       | 1.2822  | <b>2.2254**</b> | 1.8926          | 1.3487  |
| hsa-miR-532-3p                  | 1.8413                                | 1.1781  | 1.8142          | 1.4776          | 1.0914  |
| hsa-miR-532-5p                  | <b>2.1281*</b>                        | 1.1215  | 1.9841          | 1.6171          | 1.0711  |
| hsa-miR-539                     | 1.7116                                | 1.0496  | 1.4521          | 1.1497          | -0.8222 |
| hsa-miR-543                     | 1.5792                                | 1.1211  | 1.4274          | 1.0961          | -0.8522 |
| hsa-miR-548t                    | <b>2.7603**</b>                       | 1.2511  | <b>2.3801**</b> | 1.7905          | 1.2134  |
| hsa-miR-550                     | <b>2.3762**</b>                       | 1.1178  | 1.9702          | 1.8461          | 1.3119  |
| hsa-miR-550*                    | <b>2.6258**</b>                       | 1.2169  | <b>2.2221**</b> | 1.7017          | 1.1647  |
| hsa-miR-551b                    | <b>2.4019*</b>                        | 1.3706  | 2.0004          | 1.6631          | 1.1789  |
| hsa-miR-553                     | <b>2.3204*</b>                        | 1.1612  | 1.9146          | 1.4568          | 1.0028  |
| hsa-miR-557                     | <b>2.8907**</b>                       | 1.2276  | <b>2.3514**</b> | <b>2.0406*</b>  | 1.3486  |
| hsa-miR-559                     | <b>2.3283**</b>                       | 1.1079  | <b>2.0563**</b> | 1.5305          | 1.0951  |
| hsa-miR-564                     | <b>2.7975**</b>                       | 1.2455  | <b>2.3111**</b> | 1.8671          | 1.376   |
| hsa-miR-573                     | 2.0027*                               | 1.1369  | 1.6795          | 1.4066          | 1.1295  |
| hsa-miR-574-3p                  | 1.6791                                | 1.0878  | 1.4731          | 1.2143          | -0.923  |
| hsa-miR-574-5p                  | -0.4739                               | 1.1446  | -0.8836         | -0.4267         | -0.6502 |
| hsa-miR-575                     | <b>2.8155 *</b>                       | 1.2217  | <b>2.2387 *</b> | 1.8729          | 1.3057  |
| hsa-miR-576-3p                  | <b>2.1211**</b>                       | 1.0884  | 1.8608          | 1.4372          | 1.0885  |
| hsa-miR-582-5p                  | <b>2.2271**</b>                       | 1.1498  | 1.8954          | 1.4987          | 1.057   |
| hsa-miR-583                     | <b>2.6576*</b>                        | 1.2703  | <b>2.1992*</b>  | 1.9697          | 1.4903  |
| hsa-miR-584                     | 1.3403                                | -0.8651 | 1.1089          | -0.9722         | -0.9007 |
| hsa-miR-589                     | <b>2.4275**</b>                       | 1.2013  | 1.9837          | 1.6214          | 1.0738  |
| hsa-miR-590-5p                  | 1.2397                                | 1.0723  | 1.3601          | 1.2959          | 1.1257  |
| hsa-miR-595                     | <b>2.4578**</b>                       | 1.1503  | <b>2.1245*</b>  | 1.5511          | 1.259   |
| hsa-miR-598                     | 1.5478                                | 1.0828  | 1.3531          | 1.1257          | -0.852  |
| hsa-miR-601                     | <b>2.7313**</b>                       | 1.2819  | <b>2.4239**</b> | <b>2.0669**</b> | 1.6625  |
| hsa-miR-608                     | 1.637                                 | -0.9786 | 1.4726          | 1.5715          | 1.2859  |
| hsa-miR-612                     | <b>2.3136**</b>                       | 1.0439  | 1.8645          | 1.8471          | 1.0435  |
| hsa-miR-615-5p                  | <b>2.5561**</b>                       | 1.2379  | <b>2.1034**</b> | <b>2.0018**</b> | 1.7461  |
| hsa-miR-616                     | 1.2464                                | 1.0648  | 1.3123          | 1.2555          | -0.9295 |
| hsa-miR-620                     | 1.7797                                | 1.0157  | 1.4744          | 1.8154          | 1.2592  |
| hsa-miR-625                     | 1.4944                                | -0.9526 | 1.5455          | 1.4102          | 1.2881  |
| hsa-miR-625*                    | <b>2.3493**</b>                       | 1.1587  | <b>2.0215**</b> | 1.6011          | 1.0784  |

| Mature ID      | Fold Regulation (compared to Control) |         |                 |                 |         |
|----------------|---------------------------------------|---------|-----------------|-----------------|---------|
|                | MSA                                   | DLB     | AD              | PSP             | CBD     |
| hsa-miR-627    | 1.9841                                | 1.0883  | 1.6461          | 1.5092          | 1.0678  |
| hsa-miR-628-3p | <b>2.0571**</b>                       | 1.16    | 1.7652          | 1.3679          | 1.0781  |
| hsa-miR-628-5p | 1.1361                                | 1.0762  | 1.004           | -0.9114         | -0.7954 |
| hsa-miR-634    | 1.8334                                | -0.9515 | 1.6542          | 1.1774          | -0.8757 |
| hsa-miR-636    | -0.6115                               | -0.8852 | -0.6154         | -0.5355         | -0.4924 |
| hsa-miR-637    | <b>3.2121*</b>                        | 1.2164  | <b>2.4159*</b>  | <b>2.8677**</b> | 2.1196  |
| hsa-miR-638    | <b>2.5771*</b>                        | 1.1625  | <b>2.0784**</b> | <b>3.0471**</b> | 2.0288  |
| hsa-miR-643    | 1.8898                                | 1.0057  | 1.5763          | 1.3247          | -0.994  |
| hsa-miR-650    | -0.2339                               | 1.015   | -0.2541         | -0.4185         | -0.3012 |
| hsa-miR-652    | 1.5711                                | -0.9766 | 1.3999          | 1.3069          | 1.7276  |
| hsa-miR-658    | 1.1098                                | -0.8854 | -0.9735         | 1.6003          | 1.2186  |
| hsa-miR-659    | <b>2.5404**</b>                       | 1.1659  | 2.0635*         | 1.9274          | 1.3492  |
| hsa-miR-660    | <b>2.4342**</b>                       | 1.1822  | 1.9746          | 1.6124          | 1.3227  |
| hsa-miR-663    | <b>2.5973**</b>                       | 1.1743  | <b>2.2271**</b> | <b>2.0131**</b> | 1.2271  |
| hsa-miR-663b   | 1.5431                                | 1.2615  | 1.4432          | 1.2822          | 1.1701  |
| hsa-miR-664    | 1.7842                                | 1.0067  | 1.5837          | 1.2278          | -0.8826 |
| hsa-miR-664*   | 1.7218                                | 1.139   | 1.4581          | 1.2887          | 1.3076  |
| hsa-miR-665    | -0.7816                               | 1.1771  | 1.0243          | -0.9438         | -0.718  |
| hsa-miR-671-5p | <b>2.9299*</b>                        | 1.2547  | <b>2.4122**</b> | <b>2.7241**</b> | 2.1552  |
| hsa-miR-675    | <b>2.8293*</b>                        | 1.3907  | 1.9895          | <b>3.5108**</b> | 2.3224  |
| hsa-miR-675*   | <b>2.2486**</b>                       | 1.1243  | 1.9702          | 1.5356          | 1.0791  |
| hsa-miR-7      | -0.6363                               | 1.1648  | -0.6444         | -0.4699         | -0.6896 |
| hsa-miR-7-1*   | <b>2.4739**</b>                       | 1.1788  | <b>2.0315**</b> | 1.6519          | 1.1637  |
| hsa-miR-708    | 1.0772                                | 1.1421  | 1.3581          | 1.16617         | 1.8287  |
| hsa-miR-708*   | 1.8432                                | 1.0691  | 1.4721          | 1.2363          | -0.9848 |
| hsa-miR-711    | 2.0248                                | 1.0785  | 1.394           | 1.9581          | 1.3438  |
| hsa-miR-718    | <b>2.6885**</b>                       | 1.3099  | <b>2.2884**</b> | 1.9476          | 1.4081  |
| hsa-miR-720    | -0.2045                               | -0.6117 | -0.3959         | -0.4153         | -0.2035 |
| hsa-miR-744    | <b>3.2074*</b>                        | 1.0361  | 2.2114          | 1.8561          | 4.2971  |
| hsa-miR-744*   | <b>2.0273*</b>                        | 1.0797  | <b>1.9988**</b> | 1.3955          | 1.0049  |
| hsa-miR-760    | 1.8006                                | 1.0963  | 1.8284          | <b>2.3499**</b> | 1.7661  |
| hsa-miR-762    | 1.0721                                | 1.2938  | <b>2.2292*</b>  | 1.4527          | -0.9111 |
| hsa-miR-765    | -0.5619                               | -0.8849 | -0.5235         | -0.5309         | -0.5852 |
| hsa-miR-766    | 1.3645                                | -0.944  | 1.3193          | -0.9505         | -0.8254 |
| hsa-miR-769-3p | 1.5255                                | 1.165   | 1.8531          | 1.6406          | 1.7821  |
| hsa-miR-769-5p | 1.1556                                | 1.0443  | 1.3788          | 1.0859          | 1.5301  |
| hsa-miR-770-5p | 1.9137                                | 1.0929  | 1.8016          | 1.416           | 1.5435  |
| hsa-miR-802    | 1.9688                                | 1.1188  | 1.6157          | 1.2553          | -0.8372 |
| hsa-miR-873    | <b>2.2884**</b>                       | 1.1523  | 1.9609          | 1.5395          | 1.5001  |
| hsa-miR-874    | 1.3402                                | 1.0656  | <b>2.0134*</b>  | 1.6701          | 2.3102  |
| hsa-miR-877    | 1.8868                                | 1.0165  | 1.5586          | 1.8611          | 1.7729  |
| hsa-miR-877*   | 2.2608                                | 1.1984  | 1.8211          | 1.2288          | 1.0282  |
| hsa-miR-885-3p | <b>2.7219*</b>                        | -0.9997 | 2.1011          | <b>4.3474*</b>  | 2.7993  |
| hsa-miR-885-5p | 1.8791                                | 1.1229  | 1.6223          | 1.3933          | 1.4195  |
| hsa-miR-886-3p | 1.2363                                | -0.9196 | 1.0652          | 1.4006          | -0.8224 |
| hsa-miR-886-5p | -0.9973                               | -0.8597 | -0.8327         | 1.8083          | 1.1682  |
| hsa-miR-887    | <b>2.3326**</b>                       | 1.1335  | <b>2.0438**</b> | 1.583           | 1.207   |
| hsa-miR-892a   | 1.6608                                | 1.1331  | 1.3959          | 1.1412          | -0.8145 |
| hsa-miR-9      | -0.1006                               | -0.9486 | -0.1237         | -0.1409         | -0.1639 |
| hsa-miR-9*     | -0.2461                               | -0.7905 | -0.2719         | -0.2668         | -0.2857 |
| hsa-miR-920    | <b>2.1231*</b>                        | 1.0794  | 1.6901          | <b>2.1485*</b>  | 1.5368  |
| hsa-miR-921    | <b>2.2576*</b>                        | 1.163   | 1.8359          | 1.9183          | 1.3131  |
| hsa-miR-92a    | -0.6002                               | -0.6774 | -0.8012         | -0.7865         | -0.9812 |
| hsa-miR-92a-2* | <b>3.1914*</b>                        | 1.2929  | <b>2.3863**</b> | <b>3.3341**</b> | 2.4089  |

| Mature ID    | Fold Regulation (compared to Control) |         |         |                 |         |
|--------------|---------------------------------------|---------|---------|-----------------|---------|
|              | MSA                                   | DLB     | AD      | PSP             | CBD     |
| hsa-miR-92b  | 1.0459                                | -0.8623 | 1.0814  | -0.9387         | -0.9597 |
| hsa-miR-92b* | 2.4062                                | 1.1624  | 1.9231  | <b>2.4596**</b> | 1.7548  |
| hsa-miR-93   | -0.8808                               | -0.9497 | 1.1765  | -0.9915         | 1.1232  |
| hsa-miR-93*  | <b>2.2841**</b>                       | 1.1282  | 1.9331  | 1.4921          | 1.1302  |
| hsa-miR-933  | 1.0076                                | -0.7476 | 1.0601  | 3.9251          | 3.2375  |
| hsa-miR-936  | 2.0508                                | 1.0646  | 1.3523  | <b>2.2001**</b> | 1.7633  |
| hsa-miR-939  | 1.8221                                | 1.1798  | 1.5375  | 1.5596          | 1.2433  |
| hsa-miR-940  | <b>2.3191*</b>                        | 1.1279  | 1.9521  | 1.6278          | 1.2647  |
| hsa-miR-95   | 1.358                                 | 1.059   | 1.1274  | -0.9161         | -0.6693 |
| hsa-miR-96   | <b>2.5299**</b>                       | 1.2533  | 1.1135  | 1.6455          | 1.1295  |
| hsa-miR-98   | -0.3227                               | -0.9288 | -0.3769 | -0.4986         | -0.609  |
| hsa-miR-99a  | -0.7545                               | -0.8833 | -0.8935 | -0.8961         | 1.1213  |
| hsa-miR-99a* | 1.6847                                | 1.1946  | 1.5142  | 1.2517          | -0.9682 |
| hsa-miR-99b  | -0.9802                               | -0.9633 | -0.9466 | -0.9067         | -0.8388 |
| hsa-miR-99b* | <b>2.0357**</b>                       | 1.225   | 1.8181  | 1.3866          | 1.246   |

Supplementary Table 6 – Detailed results of miRNA profiles in transgenic mouse models compared to non tg mice

| Mature ID   | Fold Regulation compared to Non tg mice |                         |                         |                  |                   |
|-------------|-----------------------------------------|-------------------------|-------------------------|------------------|-------------------|
|             | MBP1-h $\alpha$ syn tg                  | MBP29-h $\alpha$ syn tg | mThy1-h $\alpha$ syn tg | mThy1-hAPP tg    | mThy1-h $\tau$ tg |
| let-7a      | -1.0122                                 | 1.1889                  | 1.0026                  | 1.5258           | -1.3176           |
| let-7b      | <b>-2.2501**</b>                        | <b>-2.3915*</b>         | -1.126                  | -1.0702          | -1.4393           |
| let-7c      | <b>-1.3827</b>                          | <b>-1.289</b>           | -1.0561                 | 1.7823           | 1.1092            |
| let-7d      | <b>1.1154</b>                           | <b>1.2912</b>           | -1.0653                 | 1.7276           | 1.1958            |
| let-7e      | <b>-1.229</b>                           | <b>-1.2596</b>          | 1.126                   | 1.0971           | 1.1016            |
| let-7f      | <b>5.002**</b>                          | <b>6.0857**</b>         | 1.0043                  | <b>7.9931**</b>  | <b>3.9211**</b>   |
| let-7g      | <b>2.5184**</b>                         | <b>3.1629**</b>         | -1.0148                 | <b>3.1122**</b>  | 1.6477            |
| let-7i      | 1.7563                                  | <b>2.1491*</b>          | 1.0543                  | <b>2.6034**</b>  | 1.9492            |
| miR-1       | <b>23.5067**</b>                        | 48.4609                 | 1.1477                  | <b>29.0155**</b> | <b>16.0139**</b>  |
| miR-101a    | <b>18.2206**</b>                        | <b>16.2844**</b>        | 1.0764                  | <b>46.1657**</b> | <b>15.7934**</b>  |
| miR-106b    | <b>4.3469**</b>                         | <b>5.9364**</b>         | -1.029                  | <b>12.637**</b>  | <b>4.3432**</b>   |
| miR-10a     | <b>2.8186**</b>                         | 3.3684                  | -1.1358                 | <b>3.5115*</b>   | 1.0434            |
| miR-10b     | <b>3.1877**</b>                         | 3.7505                  | -1.2538                 | <b>3.7679*</b>   | 1.1247            |
| miR-124     | <b>2.362**</b>                          | <b>2.4959*</b>          | -1.1437                 | <b>11.7907**</b> | <b>5.2857**</b>   |
| miR-125a-5p | -1.5502                                 | -1.3391                 | 1.0764                  | 1.0659           | -1.7196           |
| miR-125b-3p | 1.9386                                  | 1.3306                  | 1.1841                  | 1.3903           | 2.9443            |
| miR-125b-5p | -1.1231                                 | 1.157                   | -1.1637                 | 1.2749           | <b>-2.1049*</b>   |
| miR-126-3p  | <b>4.1554**</b>                         | <b>5.9432**</b>         | -1.038                  | <b>9.7896**</b>  | <b>2.8423*</b>    |
| miR-126-5p  | <b>13.1546**</b>                        | <b>18.2154**</b>        | 1.0416                  | <b>19.6132**</b> | <b>6.7252**</b>   |
| miR-130a    | <b>2.3743**</b>                         | <b>2.7424*</b>          | -1.1597                 | <b>6.3735**</b>  | <b>2.9375*</b>    |
| miR-138     | <b>2.8382**</b>                         | <b>3.1997**</b>         | -1.0009                 | <b>3.1411**</b>  | <b>2.5795**</b>   |
| miR-140     | <b>6.0106**</b>                         | <b>8.7518**</b>         | -1.0877                 | <b>17.0644**</b> | <b>4.6657**</b>   |
| miR-140*    | 1.7201                                  | 1.8677                  | 1.0896                  | <b>2.31***</b>   | 1.6707            |
| miR-141     | <b>24.0839**</b>                        | <b>12.9998**</b>        | 1.3368                  | 17.433           | -1.4987           |
| miR-142-3p  | <b>17.6305**</b>                        | <b>28.5665*</b>         | -1.0543                 | <b>32.2133**</b> | <b>12.6589**</b>  |
| miR-142-5p  | <b>2.9845**</b>                         | <b>4.7802*</b>          | 1.0061                  | <b>17.8405**</b> | <b>4.5302**</b>   |
| miR-144     | <b>16.7084**</b>                        | <b>13.6698**</b>        | -1.3649                 | <b>28.6988*</b>  | <b>7.0718**</b>   |
| miR-146a    | <b>2.6759**</b>                         | <b>5.9742*</b>          | -1.069                  | <b>4.244*</b>    | <b>2.31*</b>      |
| miR-150     | -1.0246                                 | 1.1752                  | -1.1125                 | 1.2365           | -1.5347           |
| miR-155     | -1.5                                    | 1.7206                  | -1.0362                 | -1.026           | <b>-2.4701**</b>  |
| miR-15a     | <b>8.0836**</b>                         | <b>10.8122**</b>        | -1.0746                 | <b>13.4972**</b> | <b>9.3854**</b>   |
| miR-15b     | 1.459                                   | <b>2.1049*</b>          | -1.1378                 | 1.4953           | 1.2082            |
| miR-16      | <b>3.9449**</b>                         | <b>5.4657**</b>         | -1.0616                 | <b>6.9183**</b>  | 1.8872            |
| miR-17      | 1.8213                                  | <b>3.2219**</b>         | -1.0326                 | <b>6.1671**</b>  | 1.7618            |
| miR-182     | <b>5.5117**</b>                         | <b>4.5015**</b>         | 1.1241                  | 3.6311           | -1.4146           |
| miR-183     | <b>4.8906**</b>                         | <b>3.1501**</b>         | 1.1577                  | 3.7117           | -2.5765           |
| miR-186     | <b>2.7226**</b>                         | <b>4.3583**</b>         | -1.038                  | <b>6.2064**</b>  | <b>2.608**</b>    |
| miR-18a     | <b>4.1411**</b>                         | <b>8.7822*</b>          | -1.2131                 | <b>10.7127**</b> | <b>3.6648**</b>   |
| miR-191     | 1.2016                                  | 1.5879                  | -1.2237                 | 1.8883           | -1.2987           |
| miR-196a    | -2.1214                                 | -2.1134                 | -1.3839                 | -1.3283          | -4.0476           |
| miR-196b    | -1.633                                  | -1.9369                 | -1.396                  | -1.4245          | -2.2057           |
| miR-199a-5p | <b>3.6999**</b>                         | <b>4.3709**</b>         | 1.0078                  | <b>5.7011**</b>  | <b>3.7853**</b>   |
| miR-199b    | <b>3.8637**</b>                         | <b>5.7209**</b>         | -1.0434                 | <b>5.0382**</b>  | 2.1025*           |
| miR-19a     | <b>12.0211**</b>                        | <b>21.3636**</b>        | 1.2516                  | <b>18.4696**</b> | <b>7.6719**</b>   |
| miR-19b     | <b>9.6131**</b>                         | <b>18.9123**</b>        | -1.038                  | <b>21.2283**</b> | <b>6.5906**</b>   |
| miR-20a     | <b>2.775**</b>                          | <b>5.6291**</b>         | -1.0326                 | <b>6.4961**</b>  | <b>2.2275*</b>    |

| Fold Regulation compared to Non tg mice |                        |                         |                         |                   |                  |
|-----------------------------------------|------------------------|-------------------------|-------------------------|-------------------|------------------|
| Mature ID                               | MBP1-h $\alpha$ syn tg | MBP29-h $\alpha$ syn tg | mThy1-h $\alpha$ syn tg | mThy1-hAPP tg     | mThy1-htau tg    |
| miR-21                                  | <b>13.0186**</b>       | <b>19.2317**</b>        | 1.0043                  | <b>22.5556**</b>  | <b>6.3993**</b>  |
| miR-214                                 | 1.4641                 | 1.4204                  | -1.4179                 | -1.1202           | -1.2757          |
| miR-218                                 | <b>5.4736**</b>        | <b>6.1422**</b>         | 1.0452                  | <b>6.1139**</b>   | <b>2.8243**</b>  |
| miR-22                                  | <b>2.1398*</b>         | <b>3.1831**</b>         | 1.0416                  | <b>6.7136**</b>   | <b>3.5135**</b>  |
| miR-23a                                 | <b>2.6436**</b>        | <b>3.7289**</b>         | 1.0184                  | <b>4.8191**</b>   | 1.9335           |
| miR-23b                                 | 1.9691                 | <b>2.3127**</b>         | -1.0009                 | <b>2.9409**</b>   | 1.3968           |
| miR-24                                  | <b>2.639**</b>         | <b>2.9596*</b>          | -1.1144                 | <b>4.7527**</b>   | 1.3025           |
| miR-25                                  | 1.3972                 | <b>2.0747**</b>         | 1.128                   | <b>2.0795**</b>   | -1.2294          |
| miR-27a                                 | <b>9.4972**</b>        | <b>10.3777*</b>         | -1.0131                 | <b>21.4874**</b>  | <b>5.3563**</b>  |
| miR-27b                                 | <b>3.1547**</b>        | <b>3.8738**</b>         | 1.0219                  | <b>6.4252**</b>   | <b>2.473*</b>    |
| miR-28                                  | 1.4489                 | 1.996                   | -1.0184                 | <b>2.544**</b>    | 1.0446           |
| miR-291a-3p                             | -1.7471                | -1.662                  | -1.069                  | -3.9621           | -2.3087          |
| miR-295                                 | -2.1287                | -1.6045                 | -1.842                  | -2.2121           | -4.9919          |
| miR-29a                                 | <b>3.0844**</b>        | <b>3.0253**</b>         | 1.0506                  | <b>4.7253**</b>   | <b>3.0587**</b>  |
| miR-29b                                 | <b>25.5013**</b>       | <b>20.6597**</b>        | 1.1241                  | <b>42.4811**</b>  | <b>24.8973**</b> |
| miR-302d                                | -1.2614                | -1.0482                 | -1.3601                 | -1.1286           | -1.4832          |
| miR-30a                                 | <b>3.0209**</b>        | <b>3.7505*</b>          | 1.0452                  | <b>4.7253**</b>   | 1.6467           |
| miR-30c                                 | <b>6.8685**</b>        | <b>8.4635**</b>         | 1.0543                  | <b>9.2615**</b>   | <b>4.3281**</b>  |
| miR-30d                                 | <b>2.5491**</b>        | <b>3.0605**</b>         | -1.1299                 | <b>3.9735**</b>   | 1.5048           |
| miR-30e                                 | <b>5.6178**</b>        | <b>7.1747**</b>         | 1.029                   | <b>15.4863**</b>  | <b>4.7199**</b>  |
| miR-31                                  | 1.9219                 | <b>2.3154**</b>         | -1.0452                 | <b>2.672**</b>    | 1.6137           |
| miR-32                                  | <b>24.6754**</b>       | <b>29.9521**</b>        | -1.2048                 | <b>104.0584**</b> | <b>17.2726**</b> |
| miR-322                                 | <b>9.8833**</b>        | <b>16.2468*</b>         | 1.0746                  | <b>14.242**</b>   | <b>5.1263**</b>  |
| miR-335-5p                              | <b>28.3937**</b>       | <b>27.8979**</b>        | 1.2801                  | <b>22.9764**</b>  | <b>11.8317**</b> |
| miR-34c                                 | <b>4.7982**</b>        | <b>4.8498**</b>         | 1.0543                  | <b>6.9223**</b>   | <b>3.8117**</b>  |
| miR-374                                 | <b>5.2689**</b>        | <b>6.6557**</b>         | 1.0272                  | <b>7.2497**</b>   | <b>3.0746**</b>  |
| miR-411                                 | <b>3.3173**</b>        | <b>4.3157**</b>         | 1.0839                  | <b>4.7775**</b>   | <b>2.1918*</b>   |
| miR-425                                 | <b>2.2**</b>           | <b>2.8572**</b>         | 1.0009                  | <b>3.876**</b>    | 1.8796           |
| miR-467c                                | <b>2.3134**</b>        | <b>2.617**</b>          | 1.1163                  | <b>3.1629**</b>   | 1.4278           |
| miR-467e                                | <b>5.2234**</b>        | <b>6.21**</b>           | -1.0201                 | <b>10.0881**</b>  | <b>2.8954**</b>  |
| miR-488                                 | <b>2.8235**</b>        | <b>3.1483**</b>         | -1.0877                 | <b>6.6865**</b>   | <b>4.4089**</b>  |
| miR-541                                 | 1.8277                 | <b>2.207*</b>           | -1.0254                 | <b>2.4945**</b>   | 1.3704           |
| miR-744                                 | <b>13.9288**</b>       | <b>13.3036**</b>        | -1.1457                 | <b>13.6461**</b>  | <b>12.9623**</b> |
| miR-872                                 | <b>10.4831**</b>       | <b>15.4952**</b>        | 1.082                   | <b>13.3962**</b>  | <b>6.4067**</b>  |
| miR-880                                 | -1.7994                | -1.467                  | -1.396                  | -1.3751           | <b>-2.8954*</b>  |
| miR-9                                   | <b>4.3244**</b>        | <b>5.6129*</b>          | 1.082                   | <b>7.7387**</b>   | 2.397            |
| miR-92a                                 | -1.9319                | -1.451                  | -1.0416                 | -1.9414           | <b>-2.2365**</b> |
| miR-93                                  | -1.0228                | 1.7196                  | -1.0858                 | <b>2.6306**</b>   | -1.1061          |
| miR-96                                  | <b>13.1546**</b>       | <b>9.5715**</b>         | 1.1657                  | 1.1995            | 1.5347           |
| miR-99a                                 | <b>3.6999**</b>        | <b>4.4679**</b>         | 1.2048                  | <b>3.6712**</b>   | 1.8905           |
| miR-99b                                 | -1.4845                | -1.202                  | -1.0915                 | -1.0933           | <b>-2.3943*</b>  |
